# Supplementary material for: Mobile phone use and incidence of brain tumour histological types, grading or anatomical location: a population-based ecological study
Source: PubMed Central journal article supplement — BMJ Open. 2018 Dec 9;8(12):e024489. doi: 10.1136/bmjopen-2018-024489 (PMC6292417; doi:10.1136/bmjopen-2018-024489), 2018-12-09
Supplement: bmjopen-2018-024489.draft_revisions.pdf [file bmjopen-2018-024489.draft_revisions.pdf]

# BMJ Open

BMJ Open is committed to open peer review. As part of this commitment we make the peer review history of every article we publish publicly available.

When an article is published we post the peer reviewers' comments and the authors' responses online. We also post the versions of the paper that were used during peer review. These are the versions that the peer review comments apply to.

The versions of the paper that follow are the versions that were submitted during the peer review process. They are not the versions of record or the final published versions. They should not be cited or distributed as the published version of this manuscript.

BMJ Open is an open access journal and the full, final, typeset and author-corrected version of record of the manuscript is available on our site with no access controls, subscription charges or pay-per-view fees (<http://bmjopen.bmj.com>).

If you have any questions on BMJ Open's open peer review process please email [info.bmjopen@bmj.com](mailto:info.bmjopen@bmj.com)

# BMJ Open

## Mobile phone use and incidence of brain tumour histological types, grading or anatomical location: A population-based ecological study

|                               |                                                                                                                                                                                                                                                                                                                                                                                                                                                                                                                     |
|-------------------------------|---------------------------------------------------------------------------------------------------------------------------------------------------------------------------------------------------------------------------------------------------------------------------------------------------------------------------------------------------------------------------------------------------------------------------------------------------------------------------------------------------------------------|
| Journal:                      | <i>BMJ Open</i>                                                                                                                                                                                                                                                                                                                                                                                                                                                                                                     |
| Manuscript ID                 | bmjopen-2018-024489                                                                                                                                                                                                                                                                                                                                                                                                                                                                                                 |
| Article Type:                 | Research                                                                                                                                                                                                                                                                                                                                                                                                                                                                                                            |
| Date Submitted by the Author: | 30-May-2018                                                                                                                                                                                                                                                                                                                                                                                                                                                                                                         |
| Complete List of Authors:     | Karipidis, Ken; Australian Radiation Protection and Nuclear Safety Agency, Elwood , JM ; University of Auckland, Benke, Geza; Monash University, Dept of Epidemiology and Preventive Medicine<br>Sanagou, Masoumeh; Australian Radiation Protection and Nuclear Safety Agency<br>Tjong, Lydiawati; Australian Radiation Protection and Nuclear Safety Agency<br>Croft, Rodney; Australian Centre for Electromagnetic Bioeffects Research, Illawarra Health and Medical Research Institute, University of Wollongong |
| Keywords:                     | Brain cancer, Glioma, Glioblastoma, Mobile phone, incidence trends                                                                                                                                                                                                                                                                                                                                                                                                                                                  |
|                               |                                                                                                                                                                                                                                                                                                                                                                                                                                                                                                                     |

SCHOLARONE™  
Manuscripts

1 **Mobile phone use and incidence of brain tumour histological types, grading or**  
2 **anatomical location: A population-based ecological study**  
3  
4  
5

6 Ken Karipidis, Mark Elwood, Geza Benke, Masoumeh Sanagou, Lydiawati Tjong, Rodney J.  
7 Croft  
8  
9

10  
11  
12 Ken Karipidis, Senior Scientist, Australian Radiation Protection and Nuclear Safety Agency,  
13 Yallambie, VIC, Australia, [ken.karipidis@arpansa.gov.au](mailto:ken.karipidis@arpansa.gov.au)

14 Mark Elwood, Professor, School of Population Health, University of Auckland, Auckland,  
15 New Zealand, [mark.elwood@auckland.ac.nz](mailto:mark.elwood@auckland.ac.nz)

16 Geza Benke, Senior Research Fellow, School of Public Health and Preventive Medicine,  
17 Monash University, VIC, Australia, [geza.benke@monash.edu](mailto:geza.benke@monash.edu)

18 Masoumeh Sanagou, Biostatistician, Australian Radiation Protection and Nuclear Safety  
19 Agency, Yallambie, VIC, Australia, [masoumeh.sanagou@arpansa.gov.au](mailto:masoumeh.sanagou@arpansa.gov.au)

20 Lydiawati Tjong, Science Officer, Australian Radiation Protection and Nuclear Safety  
21 Agency, Yallambie, VIC, Australia, [lydiawati.tjong@arpansa.gov.au](mailto:lydiawati.tjong@arpansa.gov.au)

22 Rodney J. Croft, Director, Australian Centre for Electromagnetic Bioeffects Research,  
23 Illawarra Health and Medical Research Institute, University of Wollongong, NSW, Australia,  
24 [rcroft@uow.edu.au](mailto:rcroft@uow.edu.au)  
25  
26  
27  
28  
29  
30  
31  
32

33 Corresponding author contact address:

34 Ken Karipidis

35 Senior Scientist

36 Australian Radiation Protection and Nuclear Safety Agency

37 619 Lower Plenty Road

38 Yallambie VIC 3085 AUSTRALIA

39 [ken.karipidis@arpansa.gov.au](mailto:ken.karipidis@arpansa.gov.au)  
40  
41  
42

43 Word count: 3702  
44  
45  
46  
47  
48  
49  
50  
51  
52  
53  
54  
55  
56  
57  
58  
59  
60

## ABSTRACT

### Objective

Some studies have reported increasing trends in certain brain tumours and a possible link with mobile phone use has been suggested. We examined the incidence time trends of brain tumour in Australia for three distinct time-periods to ascertain the influence of improved diagnostic technologies and increase in mobile phone use.

### Design

In a population based ecological study we examined trends of brain tumour over the periods 1982-1992, 1993-2002 and 2003-2013. We further compared the observed incidence during the period of substantial mobile phone use (2003-2013) with predicted (modelled) incidence for the same period by applying various relative risks, latency periods and mobile phone use scenarios.

### Setting

National incidence registration data on primary cancers of the brain diagnosed between 1982 and 2013.

### Participants

16,825 eligible brain cancer cases aged 20 to 59 (10,083 males and 6,742 females).

### Main Outcome Measures

Annual percent change (APC) in brain tumour incidence based on Poisson regression analysis.

### Results

The overall brain tumour rates remained stable during all three periods. There was an increase in glioblastoma during 1993-2002 (APC = 2.3, 95% Confidence Interval = 0.8-3.7) which was likely due to advances in the use of MRI during that period. There were no increases in any brain tumour types or sub-types, including glioma (-0.6, -1.4-0.2) and glioblastoma (0.8, -0.4-2.0), during the period of substantial mobile phone use from 2003-2013. During that period there was also no increase in glioma of the temporal lobe (0.5, -1.3-2.3), which is the location most exposed when using a mobile phone. Predicted incidence rates were higher than the observed rates for latency periods up to 15 years.

### Conclusions

In Australia, there has been no increase in any brain tumour histological type or glioma location that can be attributed to mobile phone use.

**Strengths and limitations of this study**

- This study investigated incidence time trends for different brain tumour histological types, grading and anatomical location over different time-periods.
- The study compared the observed brain tumour incidence rates with modelled predicted incidence rates assuming a causal association with mobile phone use.
- Mobile phone subscription data and information from surveys may not accurately represent mobile phone use patterns in adults.

For peer review only

## INTRODUCTION

Since its introduction in the mid-80s mobile phone use has grown rapidly worldwide. When using a mobile phone against the head, the brain is exposed to much higher levels of radiofrequency (RF) radiation than the rest of the body and there has been continuing concern of a possible association with brain cancer. Several case-control and registry-based cohort studies have found little evidence to support such an association.<sup>(1)</sup> However a few other case-control studies, most notably the Interphone study (2010) and a Swedish study by Hardell et al (2011), have reported modest to large associations with glioma, the most common type of primary brain tumour.<sup>(2-4)</sup> These studies have generally found no association with other brain tumour types such as meningioma. Based on these results the International Agency for Research on Cancer (IARC) has classified RF as “possibly carcinogenic to humans”.<sup>(5)</sup>

From a public health perspective, given that the majority of the population regularly uses mobile phones, even a relatively small excess risk would result in a significant number of additional brain tumour cases. In time, such an increase would be observable in cancer surveillance data sources.<sup>(6)</sup> The World Health Organization has previously identified as a high research priority the monitoring of brain tumour incidence trends through well-established population-based cancer registries and combined with population exposure data.<sup>(7)</sup>

Since the WHO recommendation a limited number of ecological studies have shown that although the prevalence of mobile phone use (usually measured through the number of mobile phone accounts) has seen a massive increase, the time trends of brain tumour incidence have remained fairly stable.<sup>(8, 9)</sup> Other studies have shown increases in certain brain tumour sub-types or specific anatomical locations.<sup>(9, 10)</sup> However, it has been suggested that the introduction of better diagnostic methods (computed tomography, CT; and magnetic resonance imaging, MRI) have improved the detection of brain cancers which leads to increased population incidence.<sup>(11)</sup> Further, a few recent studies, most notably in the US and Australia, have shown that predicted incidence rates based on the associations reported by the Interphone and Hardell studies for “heavy” mobile phone users are higher than the observed rates.<sup>(12, 13)</sup> Apart from the study by Little et al (2012) previous results have generally failed to show the incidence trends for different brain tumour histological and topographical types.<sup>(12)</sup> Further, the simulation of expected rates in these studies was only performed for a latency period of 10 years and if there is an association with mobile phone use the latency could be longer.

In this study, we analysed the incidence trends of brain tumour for three distinct time-periods to ascertain the influence of improved diagnostic methods and increase in mobile phone use. The analysis considered different histological types and sub-types, glioma grades and glioma anatomical sites. We further compared the observed incidence during the period of substantial mobile phone use (2003-2013) with predicted incidence for the same period based on relative risks (RRs) reported by the two epidemiological studies forming the basis of the IARC classification.<sup>(2, 3)</sup>

## METHODS

### Collection of Incidence Data

Incidence data on primary cancers of the brain and central nervous system diagnosed between 1982 and 2013 inclusive (the latest available) were obtained from the Australian Institute of Health and Welfare (AIHW). Reporting of incident invasive cancer is mandatory

in all Australian states and territories and the AIHW has been collecting and reporting national data on brain cancer incidence since 1982. The data included information on primary anatomical site (International Classification of Diseases version 10, ICD-10 topography codes, C70-C72), histology, diagnosis year and diagnosis age (in five-year groups: 0-4, 5-9 ..... 80-84, 85+). Data were not available for one Australian state (New South Wales) for the year 2013.

### Patient and public involvement

Patients or the public were not involved in this study.

### Statistical Analysis of Observed Incidence

Based on the results of the Interphone study we analysed intracranial brain cancer incidence in adults aged 20-59; neoplasms of the spinal cord, cranial nerves and other parts of central nervous system (ICD-10 code C72) were excluded. Annual age-standardized incidence rates per 100,000 person-years were calculated separately for males, females and both genders by using the World Health Organization's (WHO) standard population. Histology was analysed by categorising glioma, meningioma, other histological types and brain cancers with unspecified histology based on WHO's Classification of Tumors of the Central Nervous System.<sup>(14)</sup> We further analysed glioma by categorising glioblastoma (which is the most common brain tumour sub-type), glioma grade (low, high and unspecified) and glioma location (frontal lobe, temporal lobe, parietal lobe, other locations, overlapping lobes and unspecified). The categories analysed and their respective ICD-10 codes are shown in Table 1.

**Table 1. ICD-10 Histology and Topography Codes**

|                     |                                                                  |
|---------------------|------------------------------------------------------------------|
| <b>Histology</b>    |                                                                  |
| Glioma              | 9380-9480                                                        |
| Glioblastoma        | 9440-9442                                                        |
| Meningioma          | 9530-9539                                                        |
| Other               | 8010-9371, 9490-9508, 9540-9561                                  |
| Unspecified         | 8000-8004                                                        |
| <b>Glioma Grade</b> |                                                                  |
| Low (I & II)        | 9384, 9391, 9393, 9400, 9410, 9411, 9420, 9421, 9424, 9425, 9450 |
| High (III & IV)     | 9381, 9392, 9401, 9440-9442, 9451, 9470-9474, 9480               |
| Unspecified         | 9380, 9382, 9390, 9423, 9430, 9460,                              |
| <b>Topography</b>   |                                                                  |
| Frontal             | C711                                                             |
| Temporal            | C712                                                             |
| Parietal            | C713                                                             |
| Other locations     | C700, C701, C709, C710, C714-C717                                |
| Overlapping         | C718                                                             |
| Unspecified         | C719                                                             |

A large number of tumours had unspecified classifications, particularly for glioma grade and glioma location. We approximated the classification of unspecified tumours by recalculating the adjusted rates for each year by adding the unspecified group to the other groups in proportion to the distribution of specified tumours.

Analyses of incidence time trends were carried out using Poisson regression to estimate the annual percent change (APC) in the incidence, with corresponding 95% confidence intervals (CI) over three time-periods: 1982-1992 (representing increased CT and MRI use),

1 1993-2002 (representing advances in MRI) and 2003-2013 (representing substantial and  
2 increasing mobile phone use; more than 65% of the population).(15) Lowess smoothing  
3 was used in the graphical representation of the time trends.  
4

### 5 **Statistical Analysis of Predicted Incidence**

6 With the assumption that mobile phone use is associated with glioma in adults as reported  
7 by the Interphone and Swedish studies, we calculated predicted incidence rates and time  
8 trends by applying various relative risks (RRs, 1.5, 2, 2.5, 3) and latency periods (1, 5, 10,  
9 15, 20 years) for three different mobile phone use scenarios:

- 10 a) All users – RRs were applied to all mobile phone users
- 11 b) Heavy users – RRs were applied to heavy mobile phone users (defined as 19% of  
12 mobile phone users by the Interphone study)
- 13 c) Regular users and heavy users - RR of 1.5 applied to regular users (81% of all users)  
14 and RRs of 2, 2.5 and 3 applied to heavy users (19% of all users)  
15

16  
17 Mobile phone use was estimated using information on mobile phone accounts and survey  
18 data on actual use. Data on the annual number of mobile phone accounts from 1987 to  
19 2013 was obtained from the national telecommunications regulator, the Australian  
20 Communications and Media Authority (ACMA). The number of mobile phone accounts per  
21 capita for each year was calculated by dividing the number of accounts by the total  
22 Australian population in that year (obtained from the Australian Bureau of Statistics), noting  
23 that since 2008 the annual number of accounts has been exceeding the number of people  
24 in the population. This data is not a true indication of mobile phone use as some users may  
25 have had more than one account and other users no account. A consumer survey  
26 conducted by ACMA reported that approximately 90% of the population used mobile  
27 phones in the years 2009 to 2013.(16) We estimated the annual prevalence of mobile  
28 phone use (shown in Figure 1) by multiplying the annual number of accounts per capita by  
29 a factor of 0.9.(16) It was not possible to stratify prevalence of use by age or gender; thus  
30 an overall estimate of prevalence is provided across the 20-59 age range and for both  
31 males and females.  
32

33  
34 The annual predicted incidence rates were calculated for the period 1987-2013 using the  
35 formula:  
36

$$37 \text{ Predicted Incidence} = (P \times RR \times I_B) + ((1 - P) \times I_B)$$

38 where P denotes the annual prevalence of mobile phone use, RR the relative risk and  $I_B$  the  
39 pre-mobile phone baseline incidence from 1982-1987. Confidence intervals and statistical  
40 significance of observed and expected incidence rates were calculated using formulas  
41 in.(17) Analyses of predicted incidence time trends were carried out by estimating the APC  
42 for the period 2003-2013, representing the time that mobile phone use increased rapidly.  
43

44 We used Stata/SE 15.0 for all analyses. The reporting of our study conforms to the  
45 STROBE statement.(18)  
46

## 47 **RESULTS**

### 48 **Observed Incidence**

49 There was a total of 16,825 eligible brain cancer cases aged 20 to 59 (10,083 males and  
50 6,742 females) that were diagnosed between 1982 and 2013. Of these 15,758 (93.7%)  
51 were gliomas, 312 (1.9%) were meningiomas, 239 (1.4%) were other histological types and  
52



516 (3.1%) were tumours of unspecified histology. The most common brain tumour sub-type was glioblastoma (7,326, 43.5%). Of the gliomas 4,699 (29.8%) were low grade, 9,300 (59%) were high grade and 1759 (11.2%) were of unspecified grade. The most common glioma anatomical location was the frontal lobe (4,422, 28.1%), followed by the temporal lobe (2,952, 18.7%) and parietal lobe (2272, 14.4%). There were 2,372 (15.1%) tumours in other locations, 968 (6.1%) overlapping locations and 2772 (17.6%) with unspecified location.

The observed incidence rates between 1982 and 2013 are shown in Figure 2 for both genders and Supplementary Figure A for males and females separately. Further, the observed incidence trends (given as APC) over the time-periods 1982-1992, 1993-2002 and 2003-2013 are shown in Table 2 for both genders and Supplementary Table A for males and females separately. The overall brain tumour rates remained stable in all three time-periods and the trends were similar for males and females. Glioblastoma increased during the period that saw advances in MRI (1993-2002) whilst it remained stable during the period of substantial mobile phone use (2003-2013); this later period also saw a decrease in other glioma sub-types. There was a strong decreasing trend in brain tumours with unspecified histology during the period of increased CT and MRI use (1982-1992). With the redistribution of unspecified tumours there were no significant changes to these histological trends (Table 3 for both genders and Supplementary Table B for males and females separately).

**Table 2. Observed brain tumour incidence trends in adults (both genders, 20-59 years old) during increased CT and MRI use (1982-1982), advances in MRI use (1993-2002) and substantial mobile phone use (2003-2013)**

|                        | 1982-1992 |       |              | 1993-2002 |      |             | 2003-2013 |       |              |
|------------------------|-----------|-------|--------------|-----------|------|-------------|-----------|-------|--------------|
|                        | N         | APC*  | 95% CI       | N         | APC  | 95% CI      | N         | APC   | 95% CI       |
| All                    | 4793      | 0.1   | (-0.8,1)     | 5270      | 0.5  | (-0.5,1.5)  | 6762      | -0.8  | (-1.6,0)     |
| <b>Histology</b>       |           |       |              |           |      |             |           |       |              |
| Glioma                 | 4347      | 1.1   | (0.2,2.1)    | 4990      | 0.4  | (-0.6,1.4)  | 6421      | -0.6  | (-1.4,0.2)   |
| Glioblastoma           | 1638      | 1.4   | (-0.1,2.9)   | 2397      | 2.3  | (0.8,3.7)   | 3291      | 0.8   | (-0.4,2)     |
| Other glioma           | 2709      | 1     | (-0.2,2.2)   | 2593      | -1.2 | (-2.6,0.1)  | 3130      | -1.8  | (-2.9,-0.7)  |
| Meningioma             | 82        | -0.4  | (-6.9,6.6)   | 110       | 2.4  | (-4.2,9.4)  | 120       | -4.4  | (-10.1,1.7)  |
| Other                  | 79        | -7.3  | (-13.6,-0.6) | 66        | -1.5 | (-9.5,7.2)  | 94        | -5.3  | (-11.3,1)    |
| Unspecified            | 285       | -13.4 | (-16.6,-10)  | 104       | 4.6  | (-2.3,12)   | 127       | -4.8  | (-10.3,0.9)  |
| <b>Glioma Grade</b>    |           |       |              |           |      |             |           |       |              |
| Low                    | 1817      | 1.1   | (-0.4,2.6)   | 1418      | -3.8 | (-5.5,-2)   | 1464      | -3.1  | (-4.7,-1.5)  |
| High                   | 1938      | 3.8   | (2.3,5.2)    | 3151      | 2.1  | (0.9,3.4)   | 4211      | -0.1  | (-1.1,1)     |
| Unspecified            | 592       | -6.9  | (-9.2,-4.5)  | 421       | 2.2  | (-1.2,5.7)  | 746       | 2     | (-0.4,4.5)   |
| <b>Glioma Location</b> |           |       |              |           |      |             |           |       |              |
| Frontal                | 933       | 7.8   | (5.6,10.1)   | 1345      | 3.7  | (1.8,5.7)   | 2144      | 3     | (1.6,4.5)    |
| Temporal               | 599       | 7.3   | (4.6,10.1)   | 982       | 2.8  | (0.6,5.2)   | 1371      | 0.5   | (-1.3,2.3)   |
| Parietal               | 655       | 6.4   | (3.9,9.1)    | 801       | -1.3 | (-3.7,1.1)  | 816       | -0.4  | (-2.7,2)     |
| Other locations        | 605       | 5.1   | (2.5,7.8)    | 778       | 0.5  | (-1.9,3)    | 989       | -1.7  | (-3.8,0.3)   |
| Overlapping            | 298       | 3.5   | (-0.1,7.3)   | 296       | -8.8 | (-12.5,-5)  | 374       | -2.3  | (-5.6,1.1)   |
| Unspecified            | 1257      | -10.8 | (-12.4,-9.2) | 788       | -2.9 | (-5.2,-0.4) | 727       | -10.5 | (-12.7,-8.2) |

\*APC = Annual percent change

**Table 3. Observed brain tumour incidence trends in adults (both genders, 20-59 years old) after redistribution of unclassified tumours**

|                          | 1982-1992 |      |            | 1993-2002 |      |             | 2003-2013 |      |             |
|--------------------------|-----------|------|------------|-----------|------|-------------|-----------|------|-------------|
|                          | N         | APC* | 95% CI     | N         | APC  | 95% CI      | N         | APC  | 95% CI      |
| All                      | 4793      | 0.1  | (-0.8,1)   | 5270      | 0.5  | (-0.5,1.5)  | 6762      | -0.8 | (-1.6,0)    |
| <b>Histology</b>         |           |      |            |           |      |             |           |      |             |
| Glioma                   | 4623      | 0.2  | (-0.7,1.2) | 5094      | 0.5  | (-0.5,1.5)  | 6547      | -0.7 | (-1.5,0.1)  |
| Glioblastoma             | 1746      | 0.4  | (-1.1,1.9) | 2445      | 2.4  | (0.9,3.8)   | 3353      | 0.7  | (-0.5,1.9)  |
| Other glioma             | 2886      | 0.1  | (-1,1.2)   | 2649      | -1.1 | (-2.5,0.2)  | 3195      | -1.9 | (-3,-0.8)   |
| Meningioma               | 84        | -1.6 | (-7.9,5.2) | 110       | 2.4  | (-4.2,9.4)  | 120       | -4.4 | (-10.1,1.7) |
| Other                    | 82        | -8.6 | (-14.7,-2) | 66        | -1.5 | (-9.5,7.2)  | 94        | -5.3 | (-11.3,1)   |
| <b>Glioma Grade</b>      |           |      |            |           |      |             |           |      |             |
| Low                      | 2107      | -0.2 | (-1.5,1.2) | 1548      | -3.6 | (-5.3,-1.9) | 1659      | -2.8 | (-4.3,-1.3) |
| High                     | 2240      | 2.4  | (1.1,3.7)  | 3442      | 2.3  | (1.1,3.5)   | 4762      | 0.2  | (-0.7,1.2)  |
| <b>Glioma Topography</b> |           |      |            |           |      |             |           |      |             |
| Frontal                  | 1447      | 1.8  | (0.2,3.5)  | 1719      | 2.3  | (0.6,4)     | 2580      | 1.6  | (0.3,2.9)   |
| Temporal                 | 929       | 1.8  | (-0.2,3.9) | 1252      | 1.5  | (-0.5,3.5)  | 1656      | -1.2 | (-2.8,0.4)  |
| Parietal                 | 803       | 3.4  | (1.2,5.7)  | 894       | -2   | (-4.2,0.3)  | 880       | -1.1 | (-3.3,1.1)  |
| Other locations          | 948       | -0.5 | (-2.5,1.5) | 996       | -0.8 | (-3,1.4)    | 1198      | -3.3 | (-5.1,-1.4) |

\*APC = Annual percent change

Looking at glioma grade in Table 2, high grade gliomas increased during both periods of improved diagnosis whilst low grade gliomas decreased during the periods of advances in MRI (1993-2002) and substantial mobile phone use (2003-2013). There was a strong decreasing trend in gliomas with unspecified grade during the period of increased CT and MRI use (1982-1992). The redistribution of unspecified tumours did not change the glioma grade trends (Table 3).

For glioma location in Table 2, there were increasing trends for all locations and a strong decreasing trend for unspecified location during the period of increased CT and MRI use (1982-1992). There were also increases in the frontal and temporal lobes and a smaller decrease in unspecified location during the period of advances in MRI (1993-2002); this period also had a very large decrease in gliomas with overlapping location. During the period of substantial mobile use there were no increases in any of the locations apart from the frontal lobe and there was a strong decrease in unspecified location. With the redistribution of a high number of gliomas with unspecified and overlapping location there was a much lower increasing trend only for gliomas in the frontal lobe during all three periods and a large increase in the parietal lobe during the first period (Table 3).

### Predicted Incidence

Assuming a causal association between mobile phone use and glioma, the predicted incidence trends for both genders during 2003-2013 by applying various relative risks, latency periods and mobile phone use scenarios are shown in Table 4. The predicted incidence trends showed an increase for most mobile phone use scenarios and latency periods that were modelled apart from a 20-year latency period. There were also no statistically significant increases when applying the model to only heavy users for RRs less than 3. The highest expected trends were generally seen for a 10-year latency period, which was the latency period associated with mobile phones and brain tumour as reported in the Interphone and Swedish studies.

Table 4. Predicted glioma incidence trends for both genders (20-59 years) during 2003-2013

| Scenario                     | Latency | RR=1.5 |            | RR=2              |            | RR=2.5              |            | RR=3              |            |
|------------------------------|---------|--------|------------|-------------------|------------|---------------------|------------|-------------------|------------|
|                              |         | APC*   | 95% CI     | APC               | 95% CI     | APC                 | 95% CI     | APC               | 95% CI     |
| All Users                    | 1       | 1.1    | (0.3,1.8)  | 1.6               | (1,2.3)    | 2.0                 | (1.4,2.6)  | 2.3               | (1.7,2.8)  |
|                              | 5       | 2.8    | (2,3.5)    | 4.5               | (3.8,5.2)  | 5.7                 | (5.1,6.4)  | 6.6               | (6,7.3)    |
|                              | 10      | 2.7    | (1.9,3.6)  | 4.9               | (4.1,5.7)  | 6.7                 | (5.9,7.5)  | 8.2               | (7.4,8.9)  |
|                              | 15      | 1.3    | (0.5,2.2)  | 2.5               | (1.7,3.4)  | 3.7                 | (2.8,4.5)  | 4.8               | (3.9,5.6)  |
|                              | 20      | 0.2    | (-0.7,1)   | 0.3               | (-0.5,1.2) | 0.5                 | (-0.4,1.3) | 0.6               | (-0.2,1.5) |
| High Users                   | 1       | 0.3    | (-0.6,1.1) | 0.5               | (-0.3,1.3) | 0.7                 | (-0.1,1.5) | 0.9               | (0.1,1.6)  |
|                              | 5       | 0.6    | (-0.2,1.5) | 1.2               | (0.4,2)    | 1.8                 | (1,2.6)    | 2.2               | (1.5,3)    |
|                              | 10      | 0.3    | (-0.6,1.1) | 0.5               | (-0.3,1.4) | 0.8                 | (-0.1,1.6) | 1.0               | (0.2,1.9)  |
|                              | 15      | 0.3    | (-0.6,1.1) | 0.5               | (-0.3,1.4) | 0.8                 | (-0.1,1.6) | 1.0               | (0.2,1.9)  |
|                              | 20      | 0.0    | (-0.8,0.9) | 0.1               | (-0.8,0.9) | 0.1                 | (-0.8,0.9) | 0.1               | (-0.7,1)   |
| Regular users and high users |         |        |            | RR=1.5 (R), 2 (H) |            | RR=1.5 (R), 2.5 (H) |            | RR=1.5 (R), 3 (H) |            |
|                              | 1       |        |            | 1.2               | (0.5,1.9)  | 1.3                 | (0.6,2)    | 1.4               | (0.8,2.1)  |
|                              | 5       |        |            | 3.2               | (2.4,3.9)  | 3.5                 | (2.8,4.3)  | 3.9               | (3.1,4.6)  |
|                              | 10      |        |            | 3.2               | (2.4,4)    | 3.6                 | (2.8,4.4)  | 4.0               | (3.2,4.8)  |
|                              | 15      |        |            | 1.5               | (0.7,2.4)  | 1.8                 | (0.9,2.6)  | 2.0               | (1.2,2.9)  |
|                              | 20      |        |            | 0.2               | (-0.7,1)   | 0.2                 | (-0.6,1.1) | 0.2               | (-0.6,1.1) |

\*APC = Annual percent change

1 The observed and predicted glioma incidence rates for both genders from 1987 to 2013 are  
2 shown in Figure 3. With a RR of 2 for all mobile phone users and a latency of 10 years, the  
3 predicted incidence rate for both genders in 2013 was 7.3 per 100,000 people (95%  
4 confidence interval 6.7 to 7.9) compared to the observed 4.5 per 100,000. The predicted  
5 rates increase to 8.7 (8.1 to 9.3) and 10.2 (9.5 to 10.8) per 100,000 for RRs of 2.5 and 3  
6 respectively. With a RR of 1.5 for regular users and a RR of 2 for heavy users and a latency  
7 of 10 years the predicted rate was 6.1 per 100,000 (5.6 to 6.6); increasing to 6.4 (5.9 to 6.9)  
8 and 6.7 (6.1 to 7.2) when applying RRs of 2.5 and 3 to heavy users, respectively. Assuming  
9 a latency of 15 years, the predicted incidence rates in 2013 were also higher compared to  
10 the observed rate. The model did not show an increasing trend for a latency of 20 years.  
11  
12  
13

## 14 DISCUSSION

15  
16 The results of our study showed that the overall brain tumour rates in adults aged 20 to 59  
17 years showed no increasing or decreasing trend. This is in line with studies showing stable  
18 brain tumour trends in other countries.(9-11) Furthermore, the trends in our study were  
19 stable for different histological types, like glioma, which has been reported in some case-  
20 control studies as being associated with mobile phone use.(2, 3) The all glioma incidence  
21 rates were stable in both the periods before (1982-1992, 1993-2002) and the period after  
22 (2003-2013) substantial mobile phone use. For a causal relationship between mobile phone  
23 use and brain cancer, one would expect an increasing trend in the later period and no trend  
24 in the earlier periods.  
25  
26

27 There has been limited research showing the time trends of histological sub-types and  
28 particularly glioblastoma, which is the most common and most malignant brain tumour sub-  
29 type in adults.(4) Phillips et al (2018) reported that the incidence of glioblastoma more than  
30 doubled in England between 1995 and 2015; however the authors did not analyse different  
31 periods to investigate the impact of mobile phone use.(19) Dobes et al (2011) reported an  
32 increasing trend in glioblastoma incidence in Australia between 2000 and 2008 in people  
33 aged 65 years or older; noting that the cases were ascertained directly from neurological  
34 centres.(20) Our study used all the national incident brain cancer registrations available  
35 through Australia's high quality state and territory population-based cancer registration  
36 system. Registration is mandatory and histological verification rates exceed 85%.(13) In our  
37 study, which focused on the age group most likely to be affected by mobile phone use,  
38 there was no increase in the glioblastoma rates during the period of substantial mobile  
39 phone use but there was an increase in the glioblastoma rates in the earlier periods: 1982-  
40 1992, which saw increased use of CT and MRI, and, 1993-2002 which saw further  
41 advances in MRI. Technological developments in MRI during 1993-2002, including diffusion  
42 and perfusion imaging, improved significantly the discrimination of brain tumour types and  
43 sub-types.(15, 21) Other factors, such as improved access to care and an increase in the  
44 number of specialists, may also have played a role in the increase.(8) Earlier studies  
45 investigating trends in brain-tumour sub-types including glioblastoma have commented that  
46 increases in certain sub-types are accompanied by decreases in other sub-types whilst  
47 overall brain tumour incidence has remained stable.(22, 23) These studies suggest  
48 improvements in diagnostic technology as the reason for increasing trends in certain brain  
49 tumour sub-types.(22, 23)  
50  
51  
52

53 The results on histology are consistent with the results by grade, as high-grade glioma is  
54 approximately equivalent to glioblastoma. During the period of advances in MRI there was  
55 an increase for high-grade lesions, and a decrease for low-grade, both which levelled off  
56 during the period of substantial mobile phone use. These results are consistent with  
57  
58  
59

1 incidence trends reported by Barchana et al (2012) for low-grade and high grade gliomas in  
2 Israel between 1980 and 2009.(24) Furthermore, there was a strong decrease for  
3 unspecified histology, and for unspecified grade during the first period, and this is likely due  
4 to improvements in diagnosis using CT and histopathological classification.(25) There have  
5 also been shifts in classifying sub-types and grade in updated editions of the WHO  
6 classification; for example the WHO 2000 classification induced a shift from anaplastic  
7 astrocytoma to glioblastoma.  
8

9  
10 The results on anatomical location showed that there was a strong increase in gliomas  
11 located in the temporal and parietal lobes prior to the period of substantial mobile phone  
12 use, but not during it. There were increases for gliomas located in the frontal lobe both  
13 before and during increased mobile phone use, however the temporal and parietal lobes  
14 are more highly exposed to RF radiation than other brain sites when using mobile phones.  
15 Cardis et al (2008) reported that depending on the type of mobile phone and the manner in  
16 which it is used, the RF energy absorption is at least several times higher in the temporal  
17 lobe than in the frontal lobe.(26) In our data there was a large number of gliomas with  
18 unspecified or overlapping location. Reclassification of these did reduce the trends for the  
19 temporal lobe during the periods before substantial mobile phone use, and for the frontal  
20 lobe during all the periods.  
21

22  
23 In our study we also compared the observed incidence with a modelled predicted incidence  
24 assuming a causal association between mobile phone use and glioma as reported in the  
25 Interphone and Hardell studies. The results suggest that, if the effects of mobile phones on  
26 glioma risk are real, then the incidence rates would be far higher than those observed.  
27 Previous studies by Little et al (2012) and more recently by Chapman et al (2016) have also  
28 shown that when modelling the RRs from the Interphone and Hardell studies and assuming  
29 a latency of 10 years, the predicted incidence rates are much higher.(12, 13) The exact  
30 causes of brain cancer are unknown and so is the latency period for the disease. Ionising  
31 radiation has been shown to induce brain cancer by causing DNA damage with a latency  
32 period of about 5 or more years.(27) RF exposure is non-ionising radiation which doesn't  
33 cause direct DNA damage and it has been argued that a possible effect would have a  
34 latency shorter than 5 years.(12) However, it has also been argued that the latency for an  
35 increased risk of brain cancer could be both short and long, indicating tumour initiation and  
36 promotion, respectively.(28) In our study we modelled predicted incidence rates for a  
37 variety of latency periods up to 20 years. Our model found that the predicted incidence  
38 rates were higher than the observed rates for a latency period up to 15 years. A longer  
39 observation period is required in order to model longer latency periods.  
40  
41

42 The present study has some limitations. We estimated mobile phone use using information  
43 on mobile phone accounts, and this may not be a true indicator of actual use as some  
44 people may have multiple accounts and others may use a phone without having an  
45 account. We mitigated this by also using data from a consumer survey conducted by the  
46 national telecommunications regulator on the proportion of the population using mobile  
47 phones. Information from the survey was only available from the years 2009 to 2013 and  
48 this was applied to data on the annual number of mobile phone accounts from 1987.  
49 However, mobile phone use patterns have likely changed from 1987 to 2009. Further, the  
50 exposure metric is unclear when investigating whether mobile phone use is implicated in  
51 brain cancer risk. Prevalence of phone use is a de facto measure for the amount of RF  
52 energy a person is receiving when using a mobile phone, and changes in technology and  
53 patterns of individual use were not taken into account in this investigation. For example,  
54 advances in mobile telephony have resulted in greatly reduced output power of the phones  
55  
56  
57  
58  
59

1 and the evolving use of mobile phones has resulted in less actual calling time with the  
2 phone against the head.  
3

4 We estimated the prevalence of mobile phone use equally across the 20-59 age range and  
5 both males and females. The use of subscription data in early years is likely to  
6 underestimate prevalence of use in males and overestimate it in females given that users in  
7 early years were middle-aged working men on company mobile phone subscriptions.(13) In  
8 later years mobile phone use became equal between the two genders.(29)  
9

10 For information on the proportion of regular and heavy mobile phone users we used data  
11 from the Interphone study, which also included data from Australia. Mobile phone use in the  
12 Interphone study was self-reported, relying on participants' recall of past phone use.(2)  
13 Sensitivity analyses on the Interphone methodology reported that for short term recall (up to  
14 a year) there was underestimation of phone use by regular users and overestimation by  
15 heavy users.(30) For longer recall (3 to 5 years) there was an underestimation of number of  
16 calls and an overestimation on the duration of calls for all users.(31) Based on these  
17 findings it is likely that the proportion of heavy users in our study is overestimated. Further,  
18 the real patterns of mobile phone use may be more complex than the scenarios we  
19 modelled.  
20  
21

22 Finally the results of our study are prone to the ecological fallacy and small risks in  
23 subgroups in the population may not have been detected. Further, the stable trend in brain  
24 tumour incidence could have concealed a true increasing risk related to mobile phone use  
25 which appeared flat due to declines in other risk factors.  
26  
27

28 In conclusion, we found no evidence that mobile phone use increased any brain tumour  
29 histological types or subtypes. There was an increase in the incidence of glioblastoma prior  
30 to the rapid increase in mobile phone use which was most likely due to improved diagnosis  
31 from MRI. Furthermore, there was no increase in gliomas of the temporal lobe, which is the  
32 most exposed location, during the period of substantial mobile phone use. The increase in  
33 gliomas of the temporal lobe and decrease in gliomas of unspecified location during the  
34 periods prior to substantial mobile phone use are in line with the theory of improved  
35 diagnosis from CT and MRI. Further, the predicted rates were higher than the observed  
36 rates for latency periods up to 15 years. These results do not support an association  
37 between mobile phone use and brain tumour, although the possibility of a small risk or a  
38 latency period of more than 15 years cannot be excluded. Future research should continue  
39 to investigate trends in brain tumour histological types, grading and anatomical location for  
40 a possible increase with a longer latency period.  
41  
42

43 **Acknowledgements:** We would like to thank Professor Jeffrey Rosenfeld who consulted  
44 on the diagnosis of brain tumours, Dr Rick Tinker who assisted in the initial planning of the  
45 study, Blake Orr who assisted with the statistical analysis and Rohan Mate edited the draft  
46 paper.  
47

48 **Author Contributors:** KK, ME, GB and RC designed the study. KK and LT collected the  
49 data. KK and ME reviewed the literature. KK, ME, GB RC directed the analyses which were  
50 carried out by KK, MS and LT. KK wrote the initial draft. All authors critically revised the  
51 manuscript for intellectual content and approved the final version.  
52  
53

54 **Funding:** This work was supported by National Health and Medical Research Council grant  
55 APP1042464. The funder had no role in the study design, data collection or analysis,  
56 decision to publish, or preparation of the manuscript.  
57  
58  
59

**Competing interests:** ME has received personal fees from the New Zealand Government Health Department on an independent report on specified health issues of electric and magnetic fields. KK, GB, MS, LT and RC declare no conflict of interests.

**Ethics Approval:** Data from the AIHW had no personal identifying information. The data was collected by AIHW from each Australian state and territory cancer registry and ethics approval was required to use the data from South Australia (SA). The SA Department for Health and Ageing Human Research Ethics Committee granted ethics approval for use of the SA data (Reference Number: HREC/17/SAH/41).

**Transparency:** The lead author, KK, affirms that the manuscript is an honest, accurate, and transparent account of the study being reported; no important aspects of the study have been omitted; and any discrepancies from the study as originally planned (and, if relevant, registered) have been explained.

**Data sharing:** No additional data available.

## REFERENCES

1. SCENIHR. Final opinion on potential health effects of exposure to electromagnetic fields (EMF), 2015:288.
2. Group IS. Brain tumour risk in relation to mobile telephone use: results of the INTERPHONE international case-control study. *International journal of epidemiology* 2010;39(3):675-94.
3. Hardell L, CARLBERG M, Hansson Mild K. Pooled analysis of case-control studies on malignant brain tumours and the use of mobile and cordless phones including living and deceased subjects. *International journal of oncology* 2011;38(5):1465-74.
4. Ostrom QT, Bauchet L, Davis FG, et al. The epidemiology of glioma in adults: a "state of the science" review. *Neuro-oncology* 2014;16(7):896-913.
5. Baan R, Grosse Y, Lauby-Secretan B, et al. Carcinogenicity of radiofrequency electromagnetic fields. *The lancet oncology* 2011;12(7):624-26.
6. Rössli M, Michel G, Kuehni CE, et al. Cellular telephone use and time trends in brain tumour mortality in Switzerland from 1969 to 2002. *European journal of cancer prevention* 2007;16(1):77-82.
7. Organization WH. WHO research agenda for radiofrequency fields. 2010
8. Inskip PD, Hoover RN, Devesa SS. Brain cancer incidence trends in relation to cellular telephone use in the United States. *Neuro-oncology* 2010;12(11):1147-51.
9. Deltour I, Auvinen A, Feychting M, et al. Mobile phone use and incidence of glioma in the Nordic countries 1979-2008: consistency check. *Epidemiology* 2012;23(2):301-07.
10. de Vocht F, Burstyn I, Cherrie JW. Time trends (1998-2007) in brain cancer incidence rates in relation to mobile phone use in England. *Bioelectromagnetics* 2011;32(5):334-39.
11. Kim SJH, Ioannides SJ, Elwood JM. Trends in incidence of primary brain cancer in New Zealand, 1995 to 2010. *Australian and New Zealand Journal of Public Health* 2015;39(2):148-52.
12. Little M, Rajaraman P, Curtis R, et al. Mobile phone use and glioma risk: comparison of epidemiological study results with incidence trends in the United States. *Bmj* 2012;344:e1147.
13. Chapman S, Azizi L, Luo Q, et al. Has the incidence of brain cancer risen in Australia since the introduction of mobile phones 29 years ago? *Cancer epidemiology* 2016;42:199-205.
14. Louis DN, Perry A, Reifenberger G, et al. The 2016 World Health Organization classification of tumors of the central nervous system: a summary. *Acta neuropathologica* 2016;131(6):803-20.

- 1 15. Castillo M. History and evolution of brain tumor imaging: insights through radiology. *Radiology*  
2 2014;273(2S):S111-S25.
- 3 16. ACMA. Communications report 2015–16, 2016.
- 4 17. Ulm K. Simple method to calculate the confidence interval of a standardized mortality ratio  
5 (SMR). *American journal of epidemiology* 1990;131(2):373-75.
- 6 18. Von Elm E, Altman DG, Egger M, et al. The Strengthening the Reporting of Observational  
7 Studies in Epidemiology (STROBE) statement: guidelines for reporting observational studies.  
8 *PLoS medicine* 2007;4(10):e296.
- 9 19. Philips A, Henshaw DL, Lamburn G, et al. Brain tumours: rise in Glioblastoma Multiforme  
10 incidence in England 1995–2015 suggests an adverse environmental or lifestyle factor.  
11 *Journal of Environment and Public Health*. Forthcoming 2018.
- 12 20. Dobes M, Khurana VG, Shadbolt B, et al. Increasing incidence of glioblastoma multiforme and  
13 meningioma, and decreasing incidence of Schwannoma (2000–2008): findings of a  
14 multicenter Australian study. *Surgical neurology international* 2011;2
- 15 21. Sanghvi D. Recent advances in imaging of brain tumors. *Indian journal of cancer* 2009;46(2):82.
- 16 22. Jukich PJ, McCarthy BJ, Surawicz TS, et al. Trends in incidence of primary brain tumors in the  
17 United States, 1985-1994. *Neuro-oncology* 2001;3(3):141-51.
- 18 23. Dubrow R, Darefsky AS. Demographic variation in incidence of adult glioma by subtype, United  
19 States, 1992-2007. *BMC cancer* 2011;11(1):325.
- 20 24. Barchana M, Margalioth M, Liphshitz I. Changes in brain glioma incidence and laterality correlates  
21 with use of mobile phones-a nationwide population based study in Israel. *Asian Pacific*  
22 *Journal of Cancer Prevention* 2012;13(11):5857-63.
- 23 25. Ho VK, Reijneveld JC, Enting RH, et al. Changing incidence and improved survival of gliomas.  
24 *European journal of cancer* 2014;50(13):2309-18.
- 25 26. Cardis E, Deltour I, Mann S, et al. Distribution of RF energy emitted by mobile phones in  
26 anatomical structures of the brain. *Physics in Medicine & Biology* 2008;53(11):2771.
- 27 27. Radiation UNSCotEoA. Effects of ionizing radiation: UNSCEAR 2006 Report to the General  
28 Assembly, with scientific annexes: United Nations Publications 2009.
- 29 28. Morgan LL, Miller AB, Sasco A, et al. Mobile phone radiation causes brain tumors and should be  
30 classified as a probable human carcinogen (2A). *International journal of oncology*  
31 2015;46(5):1865-71.
- 32 29. Barr ML, Van Ritten JJ, Steel DG, et al. Inclusion of mobile phone numbers into an ongoing  
33 population health survey in New South Wales, Australia: design, methods, call outcomes,  
34 costs and sample representativeness. *BMC medical research methodology* 2012;12(1):177.
- 35 30. Vrijheid M, Cardis E, Armstrong B, et al. Validation of short term recall of mobile phone use for  
36 the Interphone study. *Occupational and environmental medicine* 2006;63(4):237-43.
- 37 31. Vrijheid M, Armstrong BK, Bédard D, et al. Recall bias in the assessment of exposure to mobile  
38 phones. *Journal of exposure science and environmental epidemiology* 2009;19(4):369.
- 39
- 40
- 41
- 42
- 43
- 44
- 45
- 46
- 47
- 48
- 49
- 50
- 51
- 52
- 53
- 54
- 55
- 56
- 57
- 58
- 59



1  
2  
3  
4  
5  
6  
7  
8  
9  
10  
11  
12  
13  
14  
15  
16  
17  
18  
19  
20  
21  
22  
23  
24  
25  
26  
27  
28  
29  
30  
31  
32  
33  
34  
35  
36  
37  
38  
39  
40  
41  
42  
43  
44  
45  
46  
47  
48  
49  
50  
51  
52  
53  
54  
55  
56  
57  
58  
59  
60

**Figure 1. Estimated Percentage of Australian Population Using Mobile Phones**

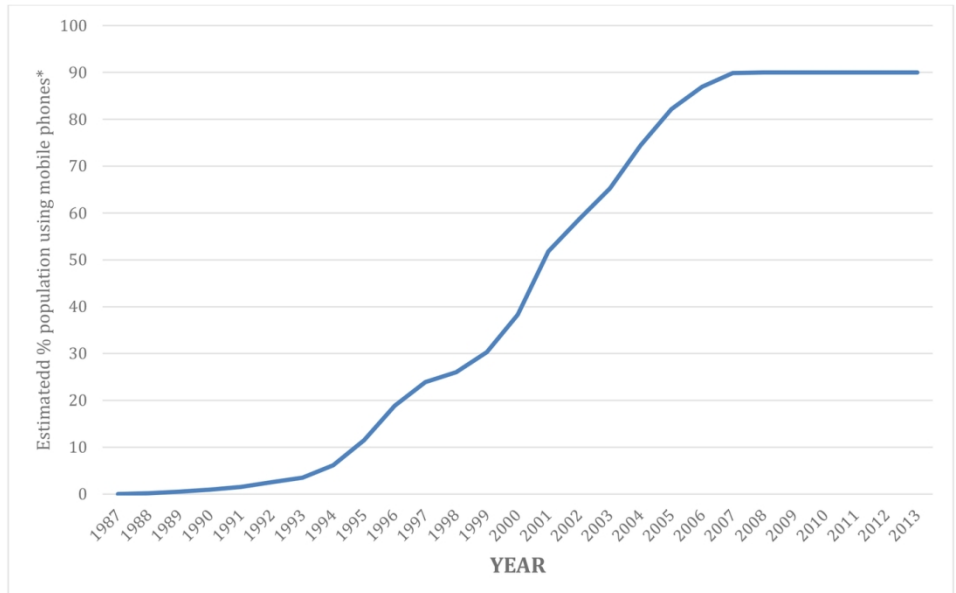

\*Based on subscription information from industry and consumer surveys

Figure 1. Estimated Percentage of Australian Population Using Mobile Phones

127x93mm (300 x 300 DPI)

Figure 2. Observed Incidence Rates (smoothed\*) in adults (both genders, 20-59 years old) during 1982-2013

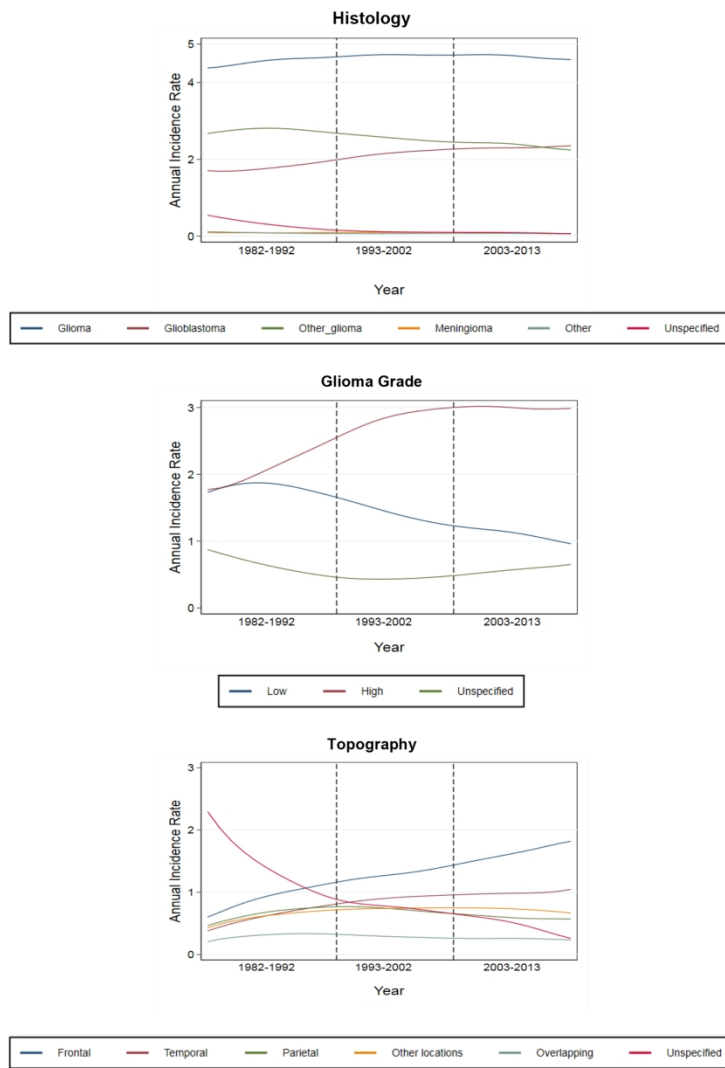

\*Lowess Smoothing

Figure 2. Observed Incidence Rates (smoothed\*) in adults (both genders, 20-59 years old) during 1982-2013

233x346mm (300 x 300 DPI)

Figure 3. Observed (smoothed\*) and predicted incidence rates in adults (both genders, 20-59 years old) during 1982-2013

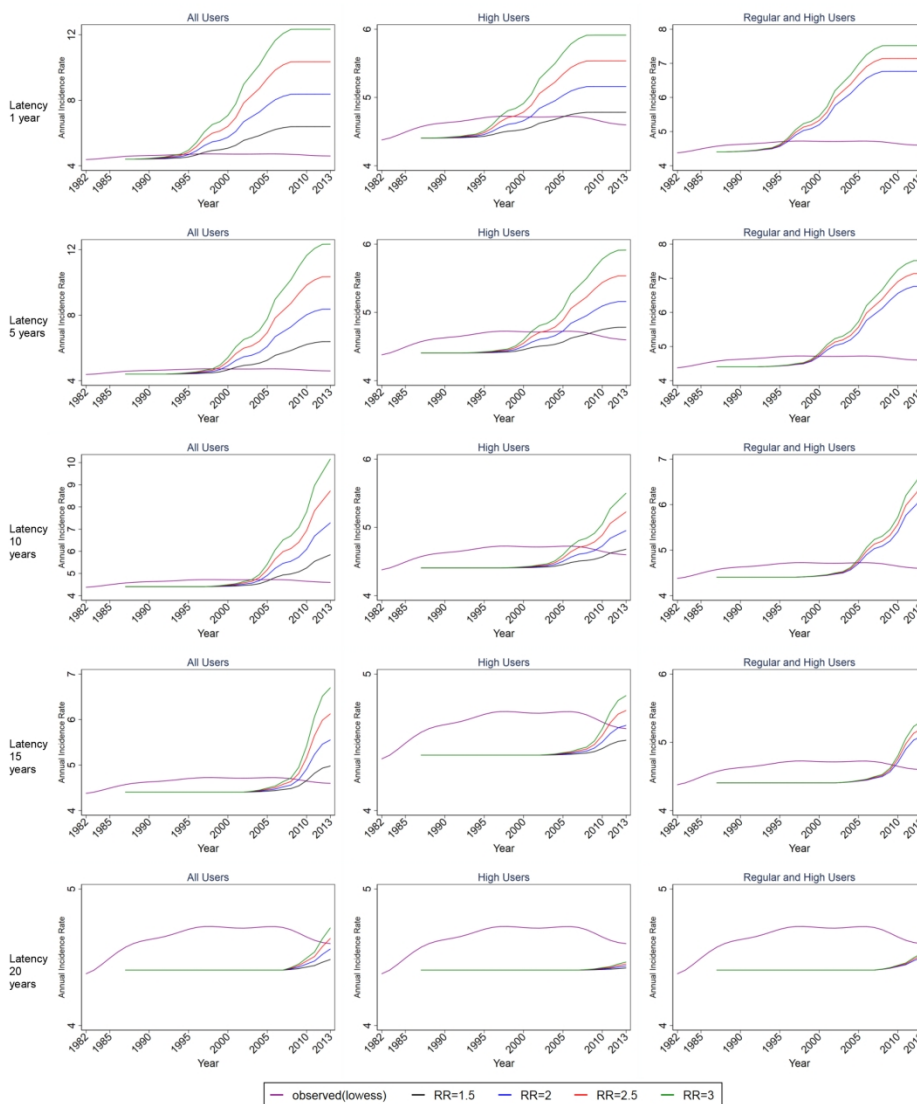

\*Lowess Smoothing

Figure 3. Observed (smoothed\*) and predicted incidence rates during 1982-2013

223x289mm (300 x 300 DPI)

**Supplementary Figure A. Observed Incidence Rates (smoothed\*) in adults (males and females, 20-59 years old) during 1982-2013**

### Histology

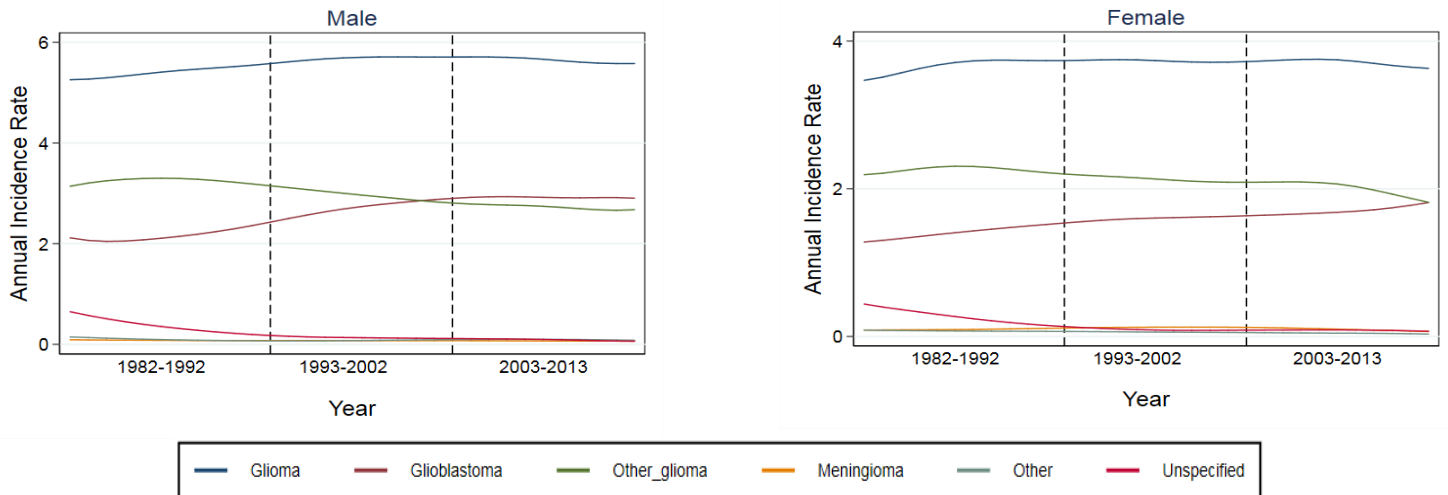

### Glioma Grade

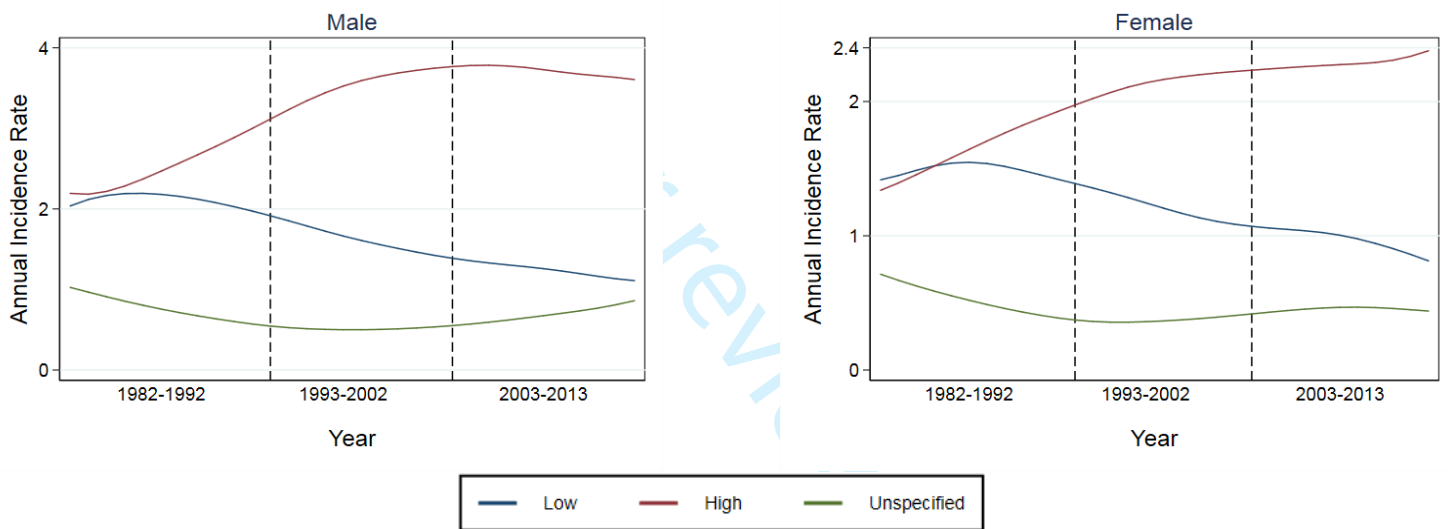

### Topography

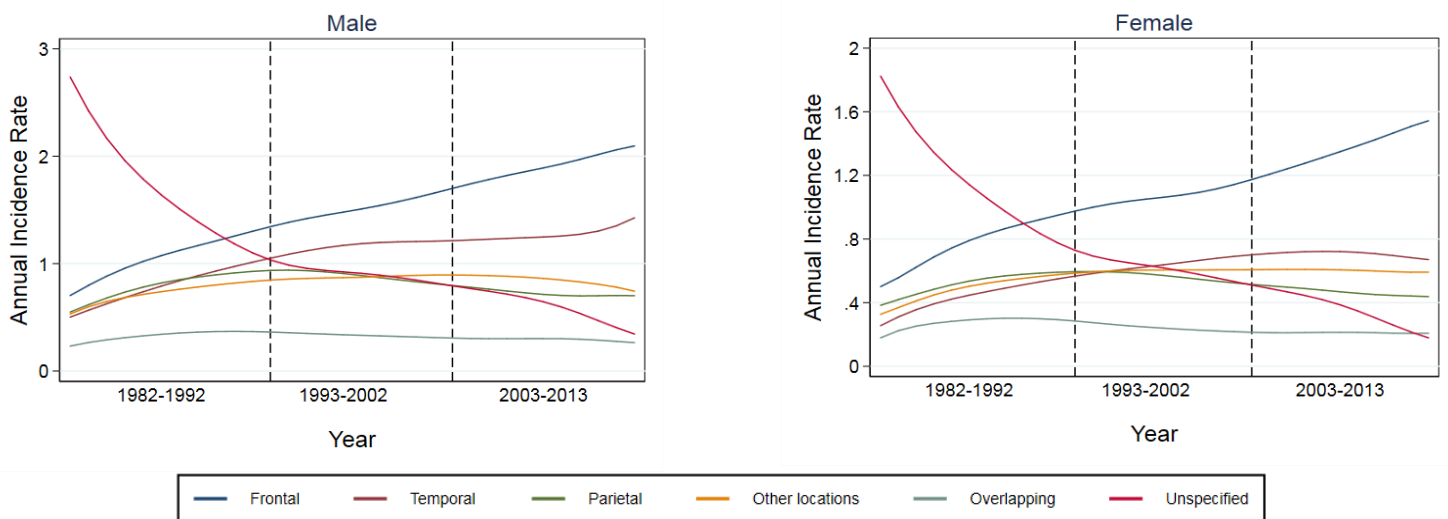

\*Lowess Smoothing

**Supplementary Table A. Observed brain tumour incidence trends in adults (males and females, 20-59 years old) during increased CT and MRI use (1982-1982), advances in MRI use (1993-2002) and substantial mobile phone use (2003-2013)**

|                        | Male      |       |               |           |      |              |           |      |              | female    |       |              |           |       |              |           |       |              |
|------------------------|-----------|-------|---------------|-----------|------|--------------|-----------|------|--------------|-----------|-------|--------------|-----------|-------|--------------|-----------|-------|--------------|
|                        | 1982-1992 |       |               | 1993-2002 |      |              | 2003-2013 |      |              | 1982-1992 |       |              | 1993-2002 |       |              | 2003-2013 |       |              |
|                        | N         | APC*  | 95% CI        | N         | APC  | 95% CI       | N         | APC  | 95% CI       | N         | APC   | 95% CI       | N         | APC   | 95% CI       | N         | APC   | 95% CI       |
| All                    | 2841      | -0.4  | (-1.5,0.8)    | 3207      | 0.8  | (-0.4,2.1)   | 4035      | -0.5 | (-1.6,0.5)   | 1952      | 0.7   | (-0.7,2.1)   | 2063      | 0.1   | (-1.4,1.6)   | 2727      | -1.2  | (-2.4,0.1)   |
| <b>Histology</b>       |           |       |               |           |      |              |           |      |              |           |       |              |           |       |              |           |       |              |
| Glioma                 | 2597      | 0.8   | (-0.4,2)      | 3064      | 0.7  | (-0.5,2)     | 3857      | -0.3 | (-1.3,0.8)   | 1750      | 1.6   | (0.1,3.1)    | 1926      | -0.1  | (-1.7,1.5)   | 2564      | -1    | (-2.3,0.3)   |
| Glioblastoma           | 996       | 1.1   | (-0.8,3.1)    | 1528      | 3.4  | (1.5,5.3)    | 2083      | 0.6  | (-0.9,2.1)   | 642       | 1.7   | (-0.7,4.2)   | 869       | 0.5   | (-1.9,2.9)   | 1208      | 1.2   | (-0.7,3.2)   |
| Other glioma           | 1601      | 0.6   | (-0.9,2.2)    | 1536      | -1.7 | (-3.4,0)     | 1774      | -1.2 | (-2.7,0.3)   | 1108      | 1.6   | (-0.3,3.5)   | 1057      | -0.5  | (-2.6,1.6)   | 1356      | -2.7  | (-4.4,-1)    |
| Meningioma             | 39        | -2.8  | (-12,7.3)     | 40        | 1.5  | (-9.1,13.4)  | 48        | -1.2 | (-10.3,8.9)  | 43        | 1.8   | (-7.2,11.7)  | 70        | 2.9   | (-5.4,11.8)  | 72        | -6.5  | (-13.8,1.3)  |
| Other                  | 44        | -11.8 | (-19.9,-2.8)  | 36        | 3.7  | (-7.6,16.3)  | 63        | -5.2 | (-12.3,2.5)  | 35        | -1.9  | (-11.5,8.8)  | 30        | -7.5  | (-18.6,5.1)  | 31        | -5.8  | (-16.2,5.9)  |
| Unspecified            | 161       | -15.2 | (-19.5,-10.8) | 67        | 1.9  | (-6.4,10.9)  | 67        | -7.9 | (-15.1,0)    | 124       | -10.9 | (-15.8,-5.8) | 37        | 9.8   | (-2.2,23.2)  | 60        | -1.4  | (-9.4,7.4)   |
| <b>Glioma Grade</b>    |           |       |               |           |      |              |           |      |              |           |       |              |           |       |              |           |       |              |
| Low                    | 1066      | 0.4   | (-1.5,2.3)    | 825       | -4.1 | (-6.4,-1.8)  | 812       | -2.9 | (-5,-0.7)    | 751       | 2.1   | (-0.1,4.5)   | 593       | -3.2  | (-5.9,-0.4)  | 652       | -3.5  | (-5.9,-1)    |
| High                   | 1179      | 3.7   | (1.9,5.6)     | 1987      | 2.9  | (1.2,4.5)    | 2615      | -0.3 | (-1.6,1)     | 759       | 3.8   | (1.5,6.1)    | 1164      | 1     | (-1,3.1)     | 1596      | 0.3   | (-1.4,2)     |
| Unspecified            | 352       | -7.2  | (-10.2,-4.1)  | 252       | 1.2  | (-3.1,5.7)   | 430       | 4.7  | (1.5,8)      | 240       | -6.4  | (-10.1,-2.6) | 169       | 3.7   | (-1.7,9.4)   | 316       | -1.5  | (-5.1,2.1)   |
| <b>Glioma Location</b> |           |       |               |           |      |              |           |      |              |           |       |              |           |       |              |           |       |              |
| Frontal                | 539       | 6.9   | (4,9.8)       | 802       | 4.4  | (1.9,7.1)    | 1252      | 2.9  | (1,4.8)      | 394       | 9.2   | (5.8,12.8)   | 543       | 2.7   | (-0.3,5.9)   | 892       | 3.3   | (1,5.6)      |
| Temporal               | 384       | 7.5   | (4.2,11)      | 655       | 3    | (0.3,5.9)    | 856       | 1.9  | (-0.4,4.3)   | 215       | 6.9   | (2.4,11.6)   | 327       | 2.6   | (-1.2,6.6)   | 515       | -1.9  | (-4.7,1.1)   |
| Parietal               | 404       | 6.8   | (3.5,10.1)    | 495       | -1.1 | (-4.1,2.1)   | 490       | 0.2  | (-2.8,3.3)   | 251       | 5.9   | (1.9,10.2)   | 306       | -1.6  | (-5.5,2.3)   | 326       | -1.3  | (-4.9,2.5)   |
| Other locations        | 358       | 3.8   | (0.4,7.2)     | 473       | 0.6  | (-2.5,3.9)   | 583       | -2   | (-4.6,0.7)   | 247       | 7.2   | (3,11.6)     | 305       | 0.4   | (-3.5,4.4)   | 406       | -1.4  | (-4.6,1.8)   |
| Overlapping            | 167       | 4.9   | (0,10.1)      | 170       | -7.7 | (-12.5,-2.6) | 217       | -2.8 | (-7.1,1.7)   | 131       | 1.9   | (-3.4,7.5)   | 126       | -10.3 | (-15.7,-4.4) | 157       | -1.7  | (-6.9,3.7)   |
| Unspecified            | 745       | -11.4 | (-13.4,-9.3)  | 469       | -3.2 | (-6.3,-0.1)  | 459       | -9.8 | (-12.6,-6.9) | 512       | -10   | (-12.4,-7.4) | 319       | -2.3  | (-6,1.6)     | 268       | -11.6 | (-15.2,-7.8) |

\*APC = Annual percent change

**Supplementary Table B. Observed brain tumour incidence trends in adults (males and females, 20-59 years old) after redistribution of unclassified tumours**

|                          | Male      |       |              |           |      |             |           |      |             | female    |      |             |           |      |             |           |      |             |
|--------------------------|-----------|-------|--------------|-----------|------|-------------|-----------|------|-------------|-----------|------|-------------|-----------|------|-------------|-----------|------|-------------|
|                          | 1982-1992 |       |              | 1993-2002 |      |             | 2003-2013 |      |             | 1982-1992 |      |             | 1993-2002 |      |             | 2003-2013 |      |             |
|                          | N         | APC*  | 95% CI       | N         | APC  | 95% CI      | N         | APC  | 95% CI      | N         | APC  | 95% CI      | N         | APC  | 95% CI      | N         | APC  | 95% CI      |
| All                      | 2841      | -0.4  | (-1.5,0.8)   | 3207      | 0.8  | (-0.4,2.1)  | 4035      | -0.5 | (-1.6,0.5)  | 1952      | 0.7  | (-0.7,2.1)  | 2063      | 0.1  | (-1.4,1.6)  | 2727      | -1.2 | (-2.4,0.1)  |
| <b>Histology</b>         |           |       |              |           |      |             |           |      |             |           |      |             |           |      |             |           |      |             |
| Glioma                   | 2755      | -0.1  | (-1.3,1.1)   | 3131      | 0.8  | (-0.5,2)    | 3924      | -0.4 | (-1.5,0.6)  | 1868      | 0.8  | (-0.6,2.2)  | 1963      | 0.1  | (-1.5,1.7)  | 2623      | -1   | (-2.3,0.3)  |
| Glioblastoma             | 1059      | 0.1   | (-1.8,2)     | 1560      | 3.4  | (1.6,5.3)   | 2118      | 0.4  | (-1,1.9)    | 687       | 0.9  | (-1.5,3.2)  | 885       | 0.6  | (-1.7,3)    | 1235      | 1.2  | (-0.7,3.2)  |
| Other glioma             | 1699      | -0.3  | (-1.8,1.2)   | 1571      | -1.7 | (-3.4,0)    | 1806      | -1.3 | (-2.8,0.2)  | 1187      | 0.7  | (-1.1,2.5)  | 1078      | -0.3 | (-2.4,1.8)  | 1389      | -2.7 | (-4.4,-1)   |
| Meningioma               | 40        | -4.1  | (-13,5.8)    | 40        | 1.5  | (-9.1,13.4) | 48        | -1.2 | (-10.3,8.9) | 44        | 0.7  | (-8.1,10.4) | 70        | 2.9  | (-5.4,11.8) | 72        | -6.5 | (-13.8,1.3) |
| Other                    | 46        | -12.9 | (-20.8,-4.1) | 36        | 3.7  | (-7.6,16.3) | 63        | -5.2 | (-12.3,2.5) | 36        | -3.2 | (-12.6,7.2) | 30        | -7.5 | (-18.6,5.1) | 31        | -5.8 | (-16.2,5.9) |
| <b>Glioma Grade</b>      |           |       |              |           |      |             |           |      |             |           |      |             |           |      |             |           |      |             |
| Low                      | 1236      | -0.8  | (-2.5,0.9)   | 899       | -4.1 | (-6.3,-1.9) | 914       | -2.2 | (-4.3,-0.2) | 871       | 0.7  | (-1.4,2.9)  | 649       | -2.9 | (-5.5,-0.3) | 745       | -3.5 | (-5.7,-1.2) |
| High                     | 1361      | 2.3   | (0.6,4)      | 2165      | 2.9  | (1.4,4.5)   | 2943      | 0.3  | (-0.9,1.6)  | 879       | 2.5  | (0.4,4.6)   | 1277      | 1.4  | (-0.5,3.4)  | 1819      | 0.1  | (-1.4,1.7)  |
| <b>Glioma Topography</b> |           |       |              |           |      |             |           |      |             |           |      |             |           |      |             |           |      |             |
| Frontal                  | 827       | 1.1   | (-1.1,3.2)   | 1013      | 3    | (0.8,5.3)   | 1515      | 1.4  | (-0.3,3.1)  | 620       | 2.9  | (0.4,5.5)   | 706       | 1.4  | (-1.3,4)    | 1065      | 1.9  | (-0.1,4)    |
| Temporal                 | 591       | 2     | (-0.5,4.7)   | 827       | 1.6  | (-0.8,4.1)  | 1036      | 0.2  | (-1.9,2.3)  | 338       | 1.4  | (-2,4.8)    | 425       | 1.3  | (-2.1,4.8)  | 620       | -3.4 | (-5.9,-0.7) |
| Parietal                 | 404       | 6.8   | (3.5,10.1)   | 495       | -1.1 | (-4.1,2.1)  | 490       | 0.2  | (-2.8,3.3)  | 399       | 0.2  | (-2.8,3.3)  | 399       | -3.1 | (-6.4,0.3)  | 390       | -2.7 | (-6,0.6)    |
| Other locations          | 556       | -1.5  | (-4.1,1.1)   | 599       | -0.8 | (-3.6,2.1)  | 710       | -3.5 | (-5.8,-1)   | 392       | 1    | (-2.1,4.2)  | 397       | -0.9 | (-4.3,2.6)  | 488       | -3   | (-5.9,-0.1) |

\*APC = Annual percent change

**STROBE Statement—checklist of items that should be included in reports of observational studies**

|                           | <b>Item No</b> | <b>Recommendation</b>                                                                                                                                                                | <b>Met</b> | <b>Page</b> | <b>If not met, reasons why not</b>                                                                                                                                                                                                                                         |
|---------------------------|----------------|--------------------------------------------------------------------------------------------------------------------------------------------------------------------------------------|------------|-------------|----------------------------------------------------------------------------------------------------------------------------------------------------------------------------------------------------------------------------------------------------------------------------|
| <b>Title and abstract</b> | 1              | (a) Indicate the study's design with a commonly used term in the title or the abstract                                                                                               | Yes        | 1           |                                                                                                                                                                                                                                                                            |
|                           |                | (b) Provide in the abstract an informative and balanced summary of what was done and what was found                                                                                  | Yes        | 2           |                                                                                                                                                                                                                                                                            |
| <b>Introduction</b>       |                |                                                                                                                                                                                      |            |             |                                                                                                                                                                                                                                                                            |
| Background/rationale      | 2              | Explain the scientific background and rationale for the investigation being reported                                                                                                 | Yes        | 4           |                                                                                                                                                                                                                                                                            |
| Objectives                | 3              | State specific objectives, including any prespecified hypotheses                                                                                                                     | Yes        | 4           |                                                                                                                                                                                                                                                                            |
| <b>Methods</b>            |                |                                                                                                                                                                                      |            |             |                                                                                                                                                                                                                                                                            |
| Study design              | 4              | Present key elements of study design early in the paper                                                                                                                              | Yes        | 4-5         |                                                                                                                                                                                                                                                                            |
| Setting                   | 5              | Describe the setting, locations, and relevant dates, including periods of recruitment, exposure, follow-up, and data collection                                                      | Yes        | 4-5         |                                                                                                                                                                                                                                                                            |
| Participants              | 6              | <i>Cross-sectional study</i> —Give the eligibility criteria, and the sources and methods of selection of participants                                                                | Yes        | 4-5         |                                                                                                                                                                                                                                                                            |
| Variables                 | 7              | Clearly define all outcomes, exposures, predictors, potential confounders, and effect modifiers. Give diagnostic criteria, if applicable                                             | Yes        | 5-6         |                                                                                                                                                                                                                                                                            |
| Data sources/ measurement | 8              | For each variable of interest, give sources of data and details of methods of assessment (measurement). Describe comparability of assessment methods if there is more than one group | Yes        | 4-5         |                                                                                                                                                                                                                                                                            |
| Bias                      | 9              | Describe any efforts to address potential sources of bias                                                                                                                            | No         |             | The study used all the available brain tumour data through Australia's high quality state and territory population-based cancer registration system. Other biases stemming from the inherent nature of the ecological study design are described in the Discussion section |
| Study size                | 10             | Explain how the study size was arrived at                                                                                                                                            | Yes        | 4-5         |                                                                                                                                                                                                                                                                            |
| Quantitative variables    | 11             | Explain how quantitative variables were handled in the analyses. If applicable, describe which groupings were chosen and why                                                         | Yes        | 5           |                                                                                                                                                                                                                                                                            |

|                     |    |                                                                                                                                                                                                              |     |     |                                                                                                                                               |
|---------------------|----|--------------------------------------------------------------------------------------------------------------------------------------------------------------------------------------------------------------|-----|-----|-----------------------------------------------------------------------------------------------------------------------------------------------|
| Statistical methods | 12 | (a) Describe all statistical methods, including those used to control for confounding                                                                                                                        | Yes | 5-6 |                                                                                                                                               |
|                     |    | (b) Describe any methods used to examine subgroups and interactions                                                                                                                                          | Yes | 5-6 |                                                                                                                                               |
|                     |    | (c) Explain how missing data were addressed                                                                                                                                                                  | Yes | 5   |                                                                                                                                               |
|                     |    | (d) <i>Cross-sectional study</i> —If applicable, describe analytical methods taking account of sampling strategy                                                                                             | N/A |     |                                                                                                                                               |
|                     |    | (e) Describe any sensitivity analyses                                                                                                                                                                        | Yes | 6   |                                                                                                                                               |
| <b>Results</b>      |    |                                                                                                                                                                                                              |     |     |                                                                                                                                               |
| Participants        | 13 | (a) Report numbers of individuals at each stage of study—eg numbers potentially eligible, examined for eligibility, confirmed eligible, included in the study, completing follow-up, and analysed            | Yes | 6-7 |                                                                                                                                               |
|                     |    | (b) Give reasons for non-participation at each stage                                                                                                                                                         | N/A |     | This is not relevant for this study (all potentially available persons were included in the analysis).                                        |
|                     |    | (c) Consider use of a flow diagram                                                                                                                                                                           | N/A |     | This is not relevant for this study (all potentially available persons were included in the analysis).                                        |
| Descriptive data    | 14 | (a) Give characteristics of study participants (eg demographic, clinical, social) and information on exposures and potential confounders                                                                     | Yes | 6-7 |                                                                                                                                               |
|                     |    | (b) Indicate number of participants with missing data for each variable of interest                                                                                                                          | N/A |     | None of the included participants had missing data. There was no available data for one Australian state (New South Wales) for the year 2013. |
| Outcome data        | 15 | <i>Cross-sectional study</i> —Report numbers of outcome events or summary measures                                                                                                                           | Yes | 7-9 |                                                                                                                                               |
| Main results        | 16 | (a) Give unadjusted estimates and, if applicable, confounder-adjusted estimates and their precision (eg, 95% confidence interval). Make clear which confounders were adjusted for and why they were included | No  |     | Giving estimates unadjusted for age will result in biased results                                                                             |
|                     |    | (b) Report category boundaries when continuous variables were categorized                                                                                                                                    | N/A |     |                                                                                                                                               |
|                     |    | (c) If relevant, consider translating estimates of relative risk into absolute risk for a meaningful time period                                                                                             | N/A |     |                                                                                                                                               |



1  
2  
3  
4  
5  
6  
7  
8  
9  
10  
11  
12  
13  
14  
15  
16  
17  
18  
19  
20  
21  
22  
23  
24  
25  
26  
27  
28  
29  
30  
31  
32  
33  
34  
35  
36  
37  
38  
39  
40  
41  
42  
43  
44  
45  
46  
47

|                   |    |                                                                                                                                                                            |     |       |
|-------------------|----|----------------------------------------------------------------------------------------------------------------------------------------------------------------------------|-----|-------|
| Other analyses    | 17 | Report other analyses done—eg analyses of subgroups and interactions, and sensitivity analyses                                                                             | Yes | 7-9   |
| <b>Discussion</b> |    |                                                                                                                                                                            |     |       |
| Key results       | 18 | Summarise key results with reference to study objectives                                                                                                                   | Yes | 10    |
| Limitations       | 19 | Discuss limitations of the study, taking into account sources of potential bias or imprecision. Discuss both direction and magnitude of any potential bias                 | Yes | 11-12 |
| Interpretation    | 20 | Give a cautious overall interpretation of results considering objectives, limitations, multiplicity of analyses, results from similar studies, and other relevant evidence | Yes | 12    |
| Generalisability  | 21 | Discuss the generalisability (external validity) of the study results                                                                                                      | Yes | 12    |
| Funding           | 22 | Give the source of funding and the role of the funders for the present study and, if applicable, for the original study on which the present article is based              | Yes | 12    |

1  
2  
3  
4  
5  
6  
7  
8  
9  
10  
11  
12  
13  
14  
15  
16  
17  
18  
19  
20  
21  
22  
23  
24  
25  
26  
27  
28  
29  
30  
31  
32  
33  
34  
35  
36  
37  
38  
39  
40  
41  
42  
43  
44  
45  
46  
47

For peer review only

# BMJ Open

## Mobile phone use and incidence of brain tumour histological types, grading or anatomical location: A population-based ecological study

|                                 |                                                                                                                                                                                                                                                                                                                                                                                                                                                                                                                          |
|---------------------------------|--------------------------------------------------------------------------------------------------------------------------------------------------------------------------------------------------------------------------------------------------------------------------------------------------------------------------------------------------------------------------------------------------------------------------------------------------------------------------------------------------------------------------|
| Journal:                        | <i>BMJ Open</i>                                                                                                                                                                                                                                                                                                                                                                                                                                                                                                          |
| Manuscript ID                   | bmjopen-2018-024489.R1                                                                                                                                                                                                                                                                                                                                                                                                                                                                                                   |
| Article Type:                   | Research                                                                                                                                                                                                                                                                                                                                                                                                                                                                                                                 |
| Date Submitted by the Author:   | 06-Aug-2018                                                                                                                                                                                                                                                                                                                                                                                                                                                                                                              |
| Complete List of Authors:       | Karipidis, Ken; Australian Radiation Protection and Nuclear Safety Agency,<br>Elwood, JM ; University of Auckland,<br>Benke, Geza; Monash University, Dept of Epidemiology and Preventive Medicine<br>Sanagou, Masoumeh; Australian Radiation Protection and Nuclear Safety Agency<br>Tjong, Lydiawati; Australian Radiation Protection and Nuclear Safety Agency<br>Croft, Rodney; Australian Centre for Electromagnetic Bioeffects Research, Illawarra Health and Medical Research Institute, University of Wollongong |
| <b>Primary Subject Heading</b>: | Public health                                                                                                                                                                                                                                                                                                                                                                                                                                                                                                            |
| Secondary Subject Heading:      | Epidemiology                                                                                                                                                                                                                                                                                                                                                                                                                                                                                                             |
| Keywords:                       | Brain cancer, Glioma, Glioblastoma, Mobile phone, incidence trends                                                                                                                                                                                                                                                                                                                                                                                                                                                       |
|                                 |                                                                                                                                                                                                                                                                                                                                                                                                                                                                                                                          |

SCHOLARONE™  
Manuscripts

1 **Mobile phone use and incidence of brain tumour histological types, grading or**  
2 **anatomical location: A population-based ecological study**  
3  
4  
5

6 Ken Karipidis, Mark Elwood, Geza Benke, Masoumeh Sanagou, Lydiawati Tjong, Rodney J.  
7 Croft  
8  
9

10  
11  
12 Ken Karipidis, Senior Scientist, Australian Radiation Protection and Nuclear Safety Agency,  
13 Yallambie, VIC, Australia, [ken.karipidis@arpansa.gov.au](mailto:ken.karipidis@arpansa.gov.au)

14 Mark Elwood, Professor, School of Population Health, University of Auckland, Auckland,  
15 New Zealand, [mark.elwood@auckland.ac.nz](mailto:mark.elwood@auckland.ac.nz)

16 Geza Benke, Senior Research Fellow, School of Public Health and Preventive Medicine,  
17 Monash University, VIC, Australia, [geza.benke@monash.edu](mailto:geza.benke@monash.edu)

18 Masoumeh Sanagou, Biostatistician, Australian Radiation Protection and Nuclear Safety  
19 Agency, Yallambie, VIC, Australia, [masoumeh.sanagou@arpansa.gov.au](mailto:masoumeh.sanagou@arpansa.gov.au)

20 Lydiawati Tjong, Science Officer, Australian Radiation Protection and Nuclear Safety  
21 Agency, Yallambie, VIC, Australia, [lydiawati.tjong@arpansa.gov.au](mailto:lydiawati.tjong@arpansa.gov.au)

22 Rodney J. Croft, Professor of Health Psychology, Australian Centre for Electromagnetic  
23 Bioeffects Research, Illawarra Health and Medical Research Institute, University of  
24 Wollongong, NSW, Australia, [rcroft@uow.edu.au](mailto:rcroft@uow.edu.au)  
25  
26  
27  
28  
29  
30  
31  
32

33 Corresponding author contact address:

34 Ken Karipidis

35 Senior Scientist

36 Australian Radiation Protection and Nuclear Safety Agency

37 619 Lower Plenty Road

38 Yallambie VIC 3085 AUSTRALIA

39 [ken.karipidis@arpansa.gov.au](mailto:ken.karipidis@arpansa.gov.au)  
40  
41  
42

43 Word count: 4003  
44  
45  
46  
47  
48  
49  
50  
51  
52  
53  
54  
55  
56  
57  
58  
59  
60

## ABSTRACT

### Objective

Some studies have reported increasing trends in certain brain tumours and a possible link with mobile phone use has been suggested. We examined the incidence time trends of brain tumour in Australia for three distinct time-periods to ascertain the influence of improved diagnostic technologies and increase in mobile phone use on the incidence of brain tumours.

### Design

In a population based ecological study we examined trends of brain tumour over the periods 1982-1992, 1993-2002 and 2003-2013. We further compared the observed incidence during the period of substantial mobile phone use (2003-2013) with predicted (modelled) incidence for the same period by applying various relative risks, latency periods and mobile phone use scenarios.

### Setting

National Australian incidence registration data on primary cancers of the brain diagnosed between 1982 and 2013.

### Population

16,825 eligible brain cancer cases aged 20 to 59 from all of Australia (10,083 males and 6,742 females).

### Main Outcome Measures

Annual percent change (APC) in brain tumour incidence based on Poisson regression analysis.

### Results

The overall brain tumour rates remained stable during all three periods. There was an increase in glioblastoma during 1993-2002 (APC = 2.3, 95% Confidence Interval = 0.8-3.7) which was likely due to advances in the use of MRI during that period. There were no increases in any brain tumour types, including glioma (-0.6, -1.4-0.2) and glioblastoma (0.8, -0.4-2.0), during the period of substantial mobile phone use from 2003-2013. During that period there was also no increase in glioma of the temporal lobe (0.5, -1.3-2.3), which is the location most exposed when using a mobile phone. Predicted incidence rates were higher than the observed rates for latency periods up to 15 years.

### Conclusions

In Australia, there has been no increase in any brain tumour histological type or glioma location that can be attributed to mobile phones.

**Strengths and limitations of this study**

- This study investigated incidence time trends for different brain tumour histological types, grading and anatomical location over different time-periods.
- The study compared the observed brain tumour incidence rates with modelled predicted incidence rates assuming a causal association with mobile phone use.
- Mobile phone subscription data and information from surveys may not accurately represent mobile phone use patterns in adults.

For peer review only

## INTRODUCTION

Since its introduction in the mid-80s mobile phone use has grown rapidly worldwide. When using a mobile phone against the head, the brain is exposed to much higher levels of radiofrequency (RF) radiation than the rest of the body (1) and there has been continuing concern of a possible association with brain cancer. Several case-control and registry-based cohort studies have found little evidence to support such an association.(1) However a few other case-control studies, most notably the Interphone study (2010) and a Swedish study by Hardell et al (2011), have reported modest to large associations with glioma, the most common type of primary brain tumour.(2-4) These studies have generally found no association with other brain tumour types such as meningioma. Based on these results the International Agency for Research on Cancer (IARC) has classified RF as “possibly carcinogenic to humans”.(5)

From a public health perspective, given that the great majority of the population regularly uses mobile phones, even a relatively small excess risk would result in a significant number of additional brain tumour cases. In time, such an increase would be observable in cancer surveillance data sources.(6) The World Health Organization has previously identified as a high research priority the monitoring of brain tumour incidence trends through well-established population-based cancer registries and combined with population exposure data.(7)

Since the WHO recommendation a limited number of ecological studies have shown that although the prevalence of mobile phone use (usually measured through the number of mobile phone accounts) has seen a massive increase, the time trends of brain tumour incidence have remained fairly stable.(8, 9) Other studies have shown increases in certain brain tumour sub-types or specific anatomical locations.(9, 10) However, it has been suggested that the introduction of better diagnostic methods (computed tomography, CT; and magnetic resonance imaging, MRI) have improved the detection of brain cancers which leads to increased population incidence.(11) Further, a few recent studies, most notably in the US and Australia, have shown that predicted incidence rates based on the associations reported by the Interphone and Hardell studies for “heavy” mobile phone users are higher than the observed rates.(12, 13) Apart from the study by Little et al (2012) previous results have generally failed to show the incidence trends for different brain tumour histological and topographical types.(12) Further, the simulation of expected rates in these studies was only performed for a latency period of 10 years and if there is an association with mobile phone use the latency could be longer.

In this study, we analysed the incidence trends of brain tumour for three distinct time-periods to ascertain the influence of improved diagnostic methods and increase in mobile phone use. The analysis considered different histological types and sub-types, glioma grades and glioma anatomical sites. We further compared the observed incidence during the period of substantial mobile phone use (2003-2013) with predicted incidence for the same period based on relative risks (RRs) reported by the two epidemiological studies forming the basis of the IARC classification.(2, 3)

## METHODS

### Collection of Incidence Data

Incidence data on primary cancers of the brain and central nervous system diagnosed between 1982 and 2013 inclusive (the latest available) were obtained from the Australian Institute of Health and Welfare (AIHW). Reporting of incident invasive cancer is mandatory

in all Australian states and territories and the AIHW has been collecting and reporting national data on brain cancer incidence since 1982. The data included information on primary anatomical site (International Classification of Diseases version 10, ICD-10 topography codes, C70-C72), histology, diagnosis year and diagnosis age (in five-year groups: 0-4, 5-9 ..... 80-84, 85+). Data were not available for one Australian state (New South Wales) for the year 2013.

### Patient and public involvement

Patients or the public were not involved in this study.

### Statistical Analysis of Observed Incidence

Based on the results of the Interphone study we analysed intracranial brain cancer incidence in adults aged 20-59; neoplasms of the spinal cord, cranial nerves and other parts of central nervous system (ICD-10 code C72) were excluded. Annual age-standardized incidence rates per 100,000 person-years were calculated separately for males, females and both genders by using the World Health Organization's (WHO) standard population. Histology was analysed by categorising glioma, meningioma, other histological types and brain cancers with unspecified histology based on WHO's Classification of Tumors of the Central Nervous System.<sup>(14)</sup> We further analysed glioma by categorising glioblastoma (which is the most common brain tumour sub-type), glioma grade (low, high and unspecified) and glioma location (frontal lobe, temporal lobe, parietal lobe, other locations, overlapping lobes and unspecified). The categories analysed and their respective ICD-10 codes are shown in Table 1.

**Table 1. ICD-10 Histology and Topography Codes**

|                     |                                                                  |
|---------------------|------------------------------------------------------------------|
| <b>Histology</b>    |                                                                  |
| Glioma              | 9380-9480                                                        |
| Glioblastoma        | 9440-9442                                                        |
| Meningioma          | 9530-9539                                                        |
| Other               | 8010-9371, 9490-9508, 9540-9561                                  |
| Unspecified         | 8000-8004                                                        |
| <b>Glioma Grade</b> |                                                                  |
| Low (I & II)        | 9384, 9391, 9393, 9400, 9410, 9411, 9420, 9421, 9424, 9425, 9450 |
| High (III & IV)     | 9381, 9392, 9401, 9440-9442, 9451, 9470-9474, 9480               |
| Unspecified         | 9380, 9382, 9390, 9423, 9430, 9460,                              |
| <b>Topography</b>   |                                                                  |
| Frontal             | C711                                                             |
| Temporal            | C712                                                             |
| Parietal            | C713                                                             |
| Other locations     | C700, C701, C709, C710, C714-C717                                |
| Overlapping         | C718                                                             |
| Unspecified         | C719                                                             |

A large number of tumours had unspecified classifications, particularly for glioma grade and glioma location. We approximated the classification of unspecified tumours by recalculating the adjusted rates for each year by adding the unspecified group to the other groups in proportion to the distribution of specified tumours.

The incidence rates were low compared to the population at risk so the variability in the observed cases was assumed to follow a Poisson distribution.<sup>(15)</sup> Analyses of incidence time trends were carried out using Poisson regression to estimate the annual percent



change (APC) in the incidence, with corresponding 95% confidence intervals (CI) over three time-periods: 1982-1992 (representing increased CT and MRI use), 1993-2002 (representing advances in MRI) and 2003-2013 (representing substantial and increasing mobile phone use; more than 65% of the population).(16) Lowess smoothing was used in the graphical representation of the time trends.

### Mobile Phone Use Data Sources

Mobile phone use was estimated using information on mobile phone accounts and survey data on actual use. Data on the annual number of mobile phone accounts from 1987, when mobile telephony first commenced in Australia, to 2013 was obtained from the national telecommunications regulator, the Australian Communications and Media Authority (ACMA). The number of mobile phone accounts per capita for each year was calculated by dividing the number of accounts by the total Australian population in that year (obtained from the Australian Bureau of Statistics), noting that since 2008 the annual number of accounts has been exceeding the number of people in the population. This data is not a true indication of mobile phone use as some users may have had more than one account and other users no account. A consumer survey conducted by ACMA reported that approximately 90% of the population used mobile phones in the years 2009 to 2013.(17) We estimated the annual prevalence of mobile phone use (shown in Figure 1) by multiplying the annual number of accounts per capita by a factor of 0.9.(17) It was not possible to stratify prevalence of use by age or gender; thus an overall estimate of prevalence is provided equally for all ages across the 20-59 age range and for both males and females.

### Statistical Analysis of Predicted Incidence

With the assumption that mobile phone use is associated with glioma in adults as reported by the Interphone and Swedish studies, we calculated predicted incidence rates and time trends by applying various relative risks (RRs, 1.5, 2, 2.5, 3) and latency periods (1, 5, 10, 15, 20 years) for three different mobile phone use scenarios:

- a) All users – RRs were applied to all mobile phone users
- b) Heavy users – RRs were applied to heavy mobile phone users (defined as 19% of mobile phone users by the Interphone study)
- c) Regular users and heavy users - RR of 1.5 applied to regular users (81% of all users) and RRs of 2, 2.5 and 3 applied to heavy users (19% of all users)

The annual predicted incidence rates were calculated for the period 1987-2013 using the formula:

$$\text{Predicted Incidence} = (P \times \text{RR} \times I_B) + ((1 - P) \times I_B)$$

where P denotes the annual prevalence of mobile phone use, RR the relative risk and  $I_B$  the pre-mobile phone baseline incidence from 1982-1987. Confidence intervals and statistical significance of observed and expected incidence rates were calculated using Poisson confidence intervals as described in Ulm (1990).(18) Analyses of predicted incidence time trends were carried out by estimating the APC for the period 2003-2013, representing the time that mobile phone use increased rapidly.

We used Stata/SE 15.0 for all analyses. The reporting of our study conforms to the STROBE statement.(19)

## RESULTS

### Observed Incidence

There was a total of 16,825 eligible brain cancer cases aged 20 to 59 (10,083 males and 6,742 females) that were diagnosed between 1982 and 2013. Of these 15,758 (93.7%) were gliomas, 312 (1.9%) were meningiomas, 239 (1.4%) were other histological types and 516 (3.1%) were tumours of unspecified histology. The most common brain tumour sub-type was glioblastoma (7,326, 43.5%). Of the gliomas, 4,699 (29.8%) were low grade, 9,300 (59%) were high grade and 1,759 (11.2%) were of unspecified grade. The most common glioma anatomical location was the frontal lobe (4,422, 28.1%), followed by the temporal lobe (2,952, 18.7%) and parietal lobe (2272, 14.4%). There were 2,372 (15.1%) tumours in other locations, 968 (6.1%) overlapping locations and 2772 (17.6%) with unspecified location.

The observed incidence rates between 1982 and 2013 are shown in Figure 2 for both genders and Supplementary Figure A for males and females separately. Further, the observed incidence trends (given as APC) over the time-periods 1982-1992, 1993-2002 and 2003-2013 are shown in Table 2 for both genders and Supplementary Table A for males and females separately. The overall brain tumour rates remained stable in all three time-periods and the trends were similar for males and females. Glioblastoma increased during the period that saw advances in MRI (1993-2002) whilst it remained stable during the period of substantial mobile phone use (2003-2013); this later period also saw a decrease in other glioma sub-types. The APC for glioblastoma in both genders for the entire observation period i.e. 1982-2013 (not shown in Table 2) was 1.45 (1.11-1.79). There was a strong decreasing trend in brain tumours with unspecified histology during the period of increased CT and MRI use (1982-1992). With the redistribution of unspecified tumours there were no significant changes to these histological trends (Table 3 for both genders and Supplementary Table B for males and females separately).

**Table 2. Observed age-standardised brain tumour incidence trends in adults (both genders, 20-59 years old) during increased CT and MRI use (1982-1992), advances in MRI use (1993-2002) and substantial mobile phone use (2003-2013)**

\*APC = Annual percent change

|                        | 1982-1992 |       |              | 1993-2002 |      |             | 2003-2013 |       |              |
|------------------------|-----------|-------|--------------|-----------|------|-------------|-----------|-------|--------------|
|                        | N         | APC*  | 95% CI       | N         | APC  | 95% CI      | N         | APC   | 95% CI       |
| All                    | 4793      | 0.1   | (-0.8,1)     | 5270      | 0.5  | (-0.5,1.5)  | 6762      | -0.8  | (-1.6,0)     |
| <b>Histology</b>       |           |       |              |           |      |             |           |       |              |
| Glioma                 | 4347      | 1.1   | (0.2,2.1)    | 4990      | 0.4  | (-0.6,1.4)  | 6421      | -0.6  | (-1.4,0.2)   |
| Glioblastoma           | 1638      | 1.4   | (-0.1,2.9)   | 2397      | 2.3  | (0.8,3.7)   | 3291      | 0.8   | (-0.4,2)     |
| Other glioma           | 2709      | 1     | (-0.2,2.2)   | 2593      | -1.2 | (-2.6,0.1)  | 3130      | -1.8  | (-2.9,-0.7)  |
| Meningioma             | 82        | -0.4  | (-6.9,6.6)   | 110       | 2.4  | (-4.2,9.4)  | 120       | -4.4  | (-10.1,1.7)  |
| Other                  | 79        | -7.3  | (-13.6,-0.6) | 66        | -1.5 | (-9.5,7.2)  | 94        | -5.3  | (-11.3,1)    |
| Unspecified            | 285       | -13.4 | (-16.6,-10)  | 104       | 4.6  | (-2.3,12)   | 127       | -4.8  | (-10.3,0.9)  |
| <b>Glioma Grade</b>    |           |       |              |           |      |             |           |       |              |
| Low                    | 1817      | 1.1   | (-0.4,2.6)   | 1418      | -3.8 | (-5.5,-2)   | 1464      | -3.1  | (-4.7,-1.5)  |
| High                   | 1938      | 3.8   | (2.3,5.2)    | 3151      | 2.1  | (0.9,3.4)   | 4211      | -0.1  | (-1.1,1)     |
| Unspecified            | 592       | -6.9  | (-9.2,-4.5)  | 421       | 2.2  | (-1.2,5.7)  | 746       | 2     | (-0.4,4.5)   |
| <b>Glioma Location</b> |           |       |              |           |      |             |           |       |              |
| Frontal                | 933       | 7.8   | (5.6,10.1)   | 1345      | 3.7  | (1.8,5.7)   | 2144      | 3     | (1.6,4.5)    |
| Temporal               | 599       | 7.3   | (4.6,10.1)   | 982       | 2.8  | (0.6,5.2)   | 1371      | 0.5   | (-1.3,2.3)   |
| Parietal               | 655       | 6.4   | (3.9,9.1)    | 801       | -1.3 | (-3.7,1.1)  | 816       | -0.4  | (-2.7,2)     |
| Other locations        | 605       | 5.1   | (2.5,7.8)    | 778       | 0.5  | (-1.9,3)    | 989       | -1.7  | (-3.8,0.3)   |
| Overlapping            | 298       | 3.5   | (-0.1,7.3)   | 296       | -8.8 | (-12.5,-5)  | 374       | -2.3  | (-5.6,1.1)   |
| Unspecified            | 1257      | -10.8 | (-12.4,-9.2) | 788       | -2.9 | (-5.2,-0.4) | 727       | -10.5 | (-12.7,-8.2) |

**Table 3. Observed age-standardised brain tumour incidence trends in adults (both genders, 20-59 years old) after redistribution of unclassified tumours**

|                          | 1982-1992 |      |            | 1993-2002 |      |             | 2003-2013 |      |             |
|--------------------------|-----------|------|------------|-----------|------|-------------|-----------|------|-------------|
|                          | N         | APC* | 95% CI     | N         | APC  | 95% CI      | N         | APC  | 95% CI      |
| All                      | 4793      | 0.1  | (-0.8,1)   | 5270      | 0.5  | (-0.5,1.5)  | 6762      | -0.8 | (-1.6,0)    |
| <b>Histology</b>         |           |      |            |           |      |             |           |      |             |
| Glioma                   | 4623      | 0.2  | (-0.7,1.2) | 5094      | 0.5  | (-0.5,1.5)  | 6547      | -0.7 | (-1.5,0.1)  |
| Glioblastoma             | 1746      | 0.4  | (-1.1,1.9) | 2445      | 2.4  | (0.9,3.8)   | 3353      | 0.7  | (-0.5,1.9)  |
| Other glioma             | 2886      | 0.1  | (-1,1.2)   | 2649      | -1.1 | (-2.5,0.2)  | 3195      | -1.9 | (-3,-0.8)   |
| Meningioma               | 84        | -1.6 | (-7.9,5.2) | 110       | 2.4  | (-4.2,9.4)  | 120       | -4.4 | (-10.1,1.7) |
| Other                    | 82        | -8.6 | (-14.7,-2) | 66        | -1.5 | (-9.5,7.2)  | 94        | -5.3 | (-11.3,1)   |
| <b>Glioma Grade</b>      |           |      |            |           |      |             |           |      |             |
| Low                      | 2107      | -0.2 | (-1.5,1.2) | 1548      | -3.6 | (-5.3,-1.9) | 1659      | -2.8 | (-4.3,-1.3) |
| High                     | 2240      | 2.4  | (1.1,3.7)  | 3442      | 2.3  | (1.1,3.5)   | 4762      | 0.2  | (-0.7,1.2)  |
| <b>Glioma Topography</b> |           |      |            |           |      |             |           |      |             |
| Frontal                  | 1447      | 1.8  | (0.2,3.5)  | 1719      | 2.3  | (0.6,4)     | 2580      | 1.6  | (0.3,2.9)   |
| Temporal                 | 929       | 1.8  | (-0.2,3.9) | 1252      | 1.5  | (-0.5,3.5)  | 1656      | -1.2 | (-2.8,0.4)  |
| Parietal                 | 803       | 3.4  | (1.2,5.7)  | 894       | -2   | (-4.2,0.3)  | 880       | -1.1 | (-3.3,1.1)  |
| Other locations          | 948       | -0.5 | (-2.5,1.5) | 996       | -0.8 | (-3,1.4)    | 1198      | -3.3 | (-5.1,-1.4) |

\*APC = Annual percent change

1 Looking at glioma grade in Table 2, high grade gliomas increased during both periods of  
2 improved diagnosis whilst low grade gliomas decreased during the periods of advances in  
3 MRI (1993-2002) and substantial mobile phone use (2003-2013). There was a strong  
4 decreasing trend in gliomas with unspecified grade during the period of increased CT and  
5 MRI use (1982-1992). The redistribution of unspecified tumours did not change the glioma  
6 grade trends (Table 3).  
7

8 For glioma location in Table 2, there were increasing trends for all locations and a strong  
9 decreasing trend for unspecified location during the period of increased CT and MRI use  
10 (1982-1992). There were also increases in the frontal and temporal lobes and a smaller  
11 decrease in unspecified location during the period of advances in MRI (1993-2002); this  
12 period also had a very large decrease in gliomas with overlapping location. During the  
13 period of substantial mobile use there were no increases in any of the locations apart from  
14 the frontal lobe and there was a strong decrease in unspecified location. With the  
15 redistribution of a high number of gliomas with unspecified and overlapping location there  
16 was a much lower increasing trend only for gliomas in the frontal lobe during all three  
17 periods and a large increase in the parietal lobe during the first period (Table 3).  
18  
19

### 20 **Predicted Incidence**

21 Assuming a causal association between mobile phone use and glioma, the predicted  
22 incidence trends for both genders during 2003-2013 by applying various relative risks,  
23 latency periods and mobile phone use scenarios are shown in Table 4. The predicted  
24 incidence trends showed an increase for most mobile phone use scenarios and latency  
25 periods that were modelled apart from a 20-year latency period. There were also no  
26 statistically significant increases when applying the model to only heavy users for RRs less  
27 than 3. The highest expected trends were generally seen for a 10-year latency period,  
28 which was the latency period associated with mobile phones and brain tumour as reported  
29 in the Interphone and Swedish studies.  
30  
31

32 The observed and predicted glioma incidence rates for both genders from 1987 to 2013 are  
33 shown in Figure 3 for a 10 year latency and Supplementary Figure B for 1, 5, 15 and 20  
34 year latencies. With a RR of 2 for all mobile phone users and a latency of 10 years, the  
35 predicted incidence rate for both genders in 2013 was 7.3 per 100,000 people (95%  
36 confidence interval 6.7 to 7.9) compared to the observed 4.5 per 100,000. The predicted  
37 rates increase to 8.7 (8.1 to 9.3) and 10.2 (9.5 to 10.8) per 100,000 for RRs of 2.5 and 3  
38 respectively. With a RR of 1.5 for regular users and a RR of 2 for heavy users and a latency  
39 of 10 years the predicted rate was 6.1 per 100,000 (5.6 to 6.6); increasing to 6.4 (5.9 to 6.9)  
40 and 6.7 (6.1 to 7.2) when applying RRs of 2.5 and 3 to heavy users, respectively. Assuming  
41 a latency of 15 years, the predicted incidence rates in 2013 were also higher compared to  
42 the observed rate. The model did not show an increasing trend for a latency of 20 years.  
43  
44  
45  
46  
47  
48  
49  
50  
51  
52  
53  
54  
55  
56  
57  
58  
59  
60

Table 4. Predicted glioma incidence trends for both genders (20-59 years) during 2003-2013

| Scenario                     | Latency | RR=1.5 |            | RR=2              |            | RR=2.5              |            | RR=3              |            |
|------------------------------|---------|--------|------------|-------------------|------------|---------------------|------------|-------------------|------------|
|                              |         | APC*   | 95% CI     | APC               | 95% CI     | APC                 | 95% CI     | APC               | 95% CI     |
| All Users                    | 1       | 1.1    | (0.3,1.8)  | 1.6               | (1,2.3)    | 2.0                 | (1.4,2.6)  | 2.3               | (1.7,2.8)  |
|                              | 5       | 2.8    | (2,3.5)    | 4.5               | (3.8,5.2)  | 5.7                 | (5.1,6.4)  | 6.6               | (6,7.3)    |
|                              | 10      | 2.7    | (1.9,3.6)  | 4.9               | (4.1,5.7)  | 6.7                 | (5.9,7.5)  | 8.2               | (7.4,8.9)  |
|                              | 15      | 1.3    | (0.5,2.2)  | 2.5               | (1.7,3.4)  | 3.7                 | (2.8,4.5)  | 4.8               | (3.9,5.6)  |
|                              | 20      | 0.2    | (-0.7,1)   | 0.3               | (-0.5,1.2) | 0.5                 | (-0.4,1.3) | 0.6               | (-0.2,1.5) |
| High Users                   | 1       | 0.3    | (-0.6,1.1) | 0.5               | (-0.3,1.3) | 0.7                 | (-0.1,1.5) | 0.9               | (0.1,1.6)  |
|                              | 5       | 0.6    | (-0.2,1.5) | 1.2               | (0.4,2)    | 1.8                 | (1,2.6)    | 2.2               | (1.5,3)    |
|                              | 10      | 0.3    | (-0.6,1.1) | 0.5               | (-0.3,1.4) | 0.8                 | (-0.1,1.6) | 1.0               | (0.2,1.9)  |
|                              | 15      | 0.3    | (-0.6,1.1) | 0.5               | (-0.3,1.4) | 0.8                 | (-0.1,1.6) | 1.0               | (0.2,1.9)  |
|                              | 20      | 0.0    | (-0.8,0.9) | 0.1               | (-0.8,0.9) | 0.1                 | (-0.8,0.9) | 0.1               | (-0.7,1)   |
| Regular users and high users |         |        |            | RR=1.5 (R), 2 (H) |            | RR=1.5 (R), 2.5 (H) |            | RR=1.5 (R), 3 (H) |            |
|                              | 1       |        |            | 1.2               | (0.5,1.9)  | 1.3                 | (0.6,2)    | 1.4               | (0.8,2.1)  |
|                              | 5       |        |            | 3.2               | (2.4,3.9)  | 3.5                 | (2.8,4.3)  | 3.9               | (3.1,4.6)  |
|                              | 10      |        |            | 3.2               | (2.4,4)    | 3.6                 | (2.8,4.4)  | 4.0               | (3.2,4.8)  |
|                              | 15      |        |            | 1.5               | (0.7,2.4)  | 1.8                 | (0.9,2.6)  | 2.0               | (1.2,2.9)  |
|                              | 20      |        |            | 0.2               | (-0.7,1)   | 0.2                 | (-0.6,1.1) | 0.2               | (-0.6,1.1) |

\*APC = Annual percent change

## DISCUSSION

The results of our study showed that the overall brain tumour rates in adults aged 20 to 59 years showed no increasing or decreasing trend. This is in line with studies showing stable brain tumour trends in other countries.(9-11) Furthermore, the trends in our study were stable for different histological types, like glioma, which has been reported in some case-control studies as being associated with mobile phone use.(2, 3) The all glioma incidence rates were stable in both the periods before (1982-1992, 1993-2002) and the period after (2003-2013) substantial mobile phone use. For a causal relationship between mobile phone use and brain cancer, one would expect an increasing trend in the later period and no trend in the earlier periods.

There has been limited research showing the time trends of histological sub-types and particularly glioblastoma, which is the most common and most malignant brain tumour sub-type in adults.(4) Phillips et al (2018) reported that the incidence of glioblastoma more than doubled in England between 1995 and 2015; however the authors did not analyse different periods to investigate the impact of mobile phone use.(20) Dobes et al (2011) reported an increasing trend in glioblastoma incidence in Australia between 2000 and 2008 in people aged 65 years or older; noting that the cases were ascertained directly from neurological centres.(21) Our study used all the national incident brain cancer registrations available through Australia's high quality state and territory population-based cancer registration system. Registration is mandatory and histological verification rates exceed 85%.(13) In our study, which focused on the age group most likely to be affected by mobile phone use, there was an increasing trend for glioblastoma when looking at the entire observation period (1982-20130). However, when looking at different time periods there was no increase in the glioblastoma rates during the period of substantial mobile phone use but there was an increase in the glioblastoma rates in the earlier periods: 1982-1992 (non-statistically significant increase), which saw increased use of CT and MRI, and, 1993-2002 (statistically significant increase) which saw further advances in MRI. Technological developments in MRI during 1993-2002, including diffusion and perfusion imaging, improved significantly the discrimination of brain tumour types and sub-types.(16, 22) Other factors, such as improved access to care and an increase in the number of specialists, may also have played a role in the increase.(8) Earlier studies investigating trends in brain-tumour sub-types including glioblastoma have commented that increases in certain sub-types are accompanied by decreases in other sub-types whilst overall brain tumour incidence has remained stable.(23, 24) These studies suggest improvements in diagnostic technology as the reason for increasing trends in certain brain tumour sub-types.(23, 24)

The results on histology are consistent with the results by grade, as high-grade glioma is approximately equivalent to glioblastoma. During the period of advances in MRI there was an increase for high-grade lesions, and a decrease for low-grade, both which levelled off during the period of substantial mobile phone use. These results are consistent with incidence trends reported by Barchana et al (2012) for low-grade and high grade gliomas in Israel between 1980 and 2009.(25) Furthermore, there was a strong decrease for unspecified histology, and for unspecified grade during the first period, and this is likely due to improvements in diagnosis using CT and histopathological classification.(26) There have also been shifts in classifying sub-types and grade in updated editions of the WHO classification; for example the WHO 2000 classification induced a shift from anaplastic astrocytoma to glioblastoma.

1 The results on anatomical location showed that there was an increase in gliomas located in  
2 the temporal and parietal lobes prior to the period of substantial mobile phone use, but not  
3 during it. There were increases for gliomas located in the frontal lobe both before and  
4 during increased mobile phone use, however the temporal and parietal lobes are more  
5 highly exposed to RF radiation than other brain sites when using mobile phones. Cardis et  
6 al (2008) reported that depending on the type of mobile phone and the manner in which it is  
7 used, the RF energy absorption is at least several times higher in the temporal lobe than in  
8 the frontal lobe.(27) In our data there was a large number of gliomas with unspecified or  
9 overlapping location. Reclassification of these did reduce the trends for the temporal lobe  
10 during the periods before substantial mobile phone use, and for the frontal lobe during all  
11 the periods.  
12  
13

14 In our study we also compared the observed incidence with a modelled predicted incidence  
15 assuming a causal association between mobile phone use and glioma as reported in the  
16 Interphone and Hardell studies. The results suggest that, if the effects of mobile phones on  
17 glioma risk are real, then the incidence rates would be far higher than those observed. We  
18 modelled predicted incidence rates for a variety of latency periods up to 20 years whereas  
19 previous studies only included latencies up to 10 years. (12, 13) Previous studies by Little et  
20 al (2012) and more recently by Chapman et al (2016) have also shown that when modelling  
21 the RRs from the Interphone and Hardell studies and assuming a latency of 10 years, the  
22 predicted incidence rates are much higher.(12, 13) The exact causes of brain cancer are  
23 unknown and so is the latency period for the disease. Ionising radiation has been shown to  
24 induce brain cancer by causing DNA damage with a latency period of about 5 or more  
25 years.(28) RF exposure is non-ionising radiation which doesn't cause direct DNA damage  
26 and it has been argued that a possible effect would have a latency shorter than 5 years.(12)  
27 However, it has also been argued that the latency for an increased risk of brain cancer  
28 could be both short and long, indicating tumour initiation and promotion, respectively.(29)  
29 In our study we modelled predicted incidence rates for a variety of latency periods up to 20  
30 years. Our model found that the predicted incidence rates were higher than the observed  
31 rates for a latency period up to 15 years. A longer observation period is required in order to  
32 model longer latency periods.  
33  
34

35 The present study has some limitations. The accuracy of the Australian cancer registration  
36 system in the early periods when it began in the 80s is unknown for all the states and  
37 territories. In Northern Territory mandatory notification of cancer cases by pathology  
38 laboratories was introduced in 1991. Case ascertainment was found to be approximately  
39 40% incomplete for the period 1981-1986 and approximately 10% incomplete for the period  
40 1987-1990. However the Northern Territory makes up a very small proportion of Australia's  
41 population (~ 1%).(30) All Australian state and territory registries conform to the  
42 International Agency for Research on Cancer's criteria for population based cancer  
43 registration, are "A" rated and have their data published in the "Cancer Incidence in Five  
44 Continents" series. (13, 31).  
45  
46

47 We estimated mobile phone use using information on mobile phone accounts, and this may  
48 not be a true indicator of actual use as some people may have multiple accounts and others  
49 may use a phone without having an account. We mitigated this by also using data from a  
50 consumer survey conducted by the national telecommunications regulator on the proportion  
51 of the population using mobile phones. Information from the survey was only available from  
52 the years 2009 to 2013 and this was applied to data on the annual number of mobile phone  
53 accounts from 1987. However, mobile phone use patterns have likely changed from 1987 to  
54 2009. Further, the exposure metric is unclear when investigating whether mobile phone use  
55 is implicated in brain cancer risk. Prevalence of phone use is a de facto measure for the  
56  
57  
58  
59

1 amount of RF energy a person is receiving when using a mobile phone, and changes in  
2 technology and patterns of individual use were not taken into account in this investigation.  
3 For example, advances in mobile telephony have resulted in greatly reduced output power  
4 of the phones and the evolving use of mobile phones has resulted in less actual calling time  
5 with the phone against the head.  
6

7 We estimated the prevalence of mobile phone use equally across the 20-59 age range and  
8 both males and females. The use of subscription data in early years is likely to  
9 underestimate prevalence of use in males and overestimate it in females given that users in  
10 early years were middle-aged working men on company mobile phone subscriptions.(13) In  
11 later years mobile phone use became equal between the two genders.(32)  
12  
13

14 For information on the proportion of regular and heavy mobile phone users we used data  
15 from the Interphone study, which also included data from Australia. Mobile phone use in the  
16 Interphone study was self-reported, relying on participants' recall of past phone use.(2)  
17 Sensitivity analyses on the Interphone methodology reported that for short term recall (up to  
18 a year) there was underestimation of phone use by regular users and overestimation by  
19 heavy users.(33) For longer recall (3 to 5 years) there was an underestimation of number of  
20 calls and an overestimation on the duration of calls for all users.(34) Based on these  
21 findings it is likely that the proportion of heavy users in our study is overestimated. Further,  
22 the real patterns of mobile phone use may be more complex than the scenarios we  
23 modelled.  
24  
25

26 Finally this is an ecological observational study, not based on individual data thus it is not  
27 possible to account for confounding factors. This study design is appropriate to define  
28 global trends. The results of our study are prone to the ecological fallacy and small risks in  
29 subgroups in the population may not have been detected. Further, the stable trend in brain  
30 tumour incidence could have concealed a true increasing risk related to mobile phone use  
31 which appeared flat due to declines in other risk factors.  
32  
33

34 In conclusion, we found no evidence that mobile phone use increased any brain tumour  
35 histological types or subtypes. There was an increase in the incidence of glioblastoma prior  
36 to the rapid increase in mobile phone use which was most likely due to improved diagnosis  
37 from MRI. Furthermore, there was no increase in gliomas of the temporal lobe, which is the  
38 most exposed location, during the period of substantial mobile phone use. The increase in  
39 gliomas of the temporal lobe and decrease in gliomas of unspecified location during the  
40 periods prior to substantial mobile phone use are in line with the theory of improved  
41 diagnosis from CT and MRI. Further, the predicted rates were higher than the observed  
42 rates for latency periods up to 15 years. These results do not support an association  
43 between mobile phone use and brain tumour, although the possibility of a small risk or a  
44 latency period of more than 15 years cannot be excluded. Future research should continue  
45 to investigate trends in brain tumour histological types, grading and anatomical location for  
46 a possible increase with a longer latency period.  
47  
48

49 **Acknowledgements:** We would like to thank Professor Jeffrey Rosenfeld who consulted  
50 on the diagnosis of brain tumours, Dr Rick Tinker who assisted in the initial planning of the  
51 study, Blake Orr who assisted with the statistical analysis and Rohan Mate edited the draft  
52 paper.  
53

54 **Author Contributors:** KK, ME, GB and RC designed the study. KK and LT collected the  
55 data. KK and ME reviewed the literature. KK, ME, GB RC directed the analyses which were  
56  
57  
58  
59  
60



1 carried out by KK, MS and LT. KK wrote the initial draft. All authors critically revised the  
2 manuscript for intellectual content and approved the final version.  
3

4 **Funding:** This work was supported by National Health and Medical Research Council grant  
5 APP1042464. The funder had no role in the study design, data collection or analysis,  
6 decision to publish, or preparation of the manuscript.  
7

8 **Competing interests:** ME has received personal fees from the New Zealand Government  
9 Health Department on an independent report on specified health issues of electric and  
10 magnetic fields. KK, GB, MS, LT and RC declare no conflict of interests.  
11

12 **Ethics Approval:** Data from the AIHW had no personal identifying information. The data  
13 was collected by AIHW from each Australian state and territory cancer registry and ethics  
14 approval was required to use the data from South Australia (SA). The SA Department for  
15 Health and Ageing Human Research Ethics Committee granted ethics approval for use of  
16 the SA data (Reference Number: HREC/17/SAH/41).  
17

18 **Transparency:** The lead author, KK, affirms that the manuscript is an honest, accurate,  
19 and transparent account of the study being reported; no important aspects of the study  
20 have been omitted; and any discrepancies from the study as originally planned (and, if  
21 relevant, registered) have been explained.  
22

23 **Data sharing:** No additional data available.  
24

## 25 REFERENCES

- 26 1. Cardis E, Deltour I, Mann S, Moissonnier M, Taki M, Varsier N, et al. Distribution of RF  
27 energy emitted by mobile phones in anatomical structures of the brain. *Physics in*  
28 *Medicine & Biology*. 2008;53(11):2771.  
29
- 30 2. SCENIHR. Final opinion on potential health effects of exposure to electromagnetic fields  
31 (EMF). 2015.  
32
- 33 3. INTERPHONE Study Group. Brain tumour risk in relation to mobile telephone use:  
34 results of the INTERPHONE international case-control study. *International journal of*  
35 *epidemiology*. 2010;39(3):675-94.  
36
- 37 4. Hardell L, Carlberg M, Hansson Mild K. Pooled analysis of case-control studies on  
38 malignant brain tumours and the use of mobile and cordless phones including living  
39 and deceased subjects. *International journal of oncology*. 2011;38(5):1465-74.  
40
- 41 5. Ostrom QT, Bauchet L, Davis FG, Deltour I, Fisher JL, Langer CE, et al. The  
42 epidemiology of glioma in adults: a "state of the science" review. *Neuro-oncology*.  
43 2014;16(7):896-913.  
44
- 45 6. Baan R, Grosse Y, Lauby-Secretan B, El Ghissassi F, Bouvard V, Benbrahim-Tallaa L, et  
46 al. Carcinogenicity of radiofrequency electromagnetic fields. *The lancet oncology*.  
47 2011;12(7):624-6.  
48
- 49 7. Rösli M, Michel G, Kuehni CE, Spoerri A. Cellular telephone use and time trends in  
50 brain tumour mortality in Switzerland from 1969 to 2002. *European journal of cancer*  
51 *prevention*. 2007;16(1):77-82.  
52
- 53 8. Organization WH. WHO research agenda for radiofrequency fields. 2010.  
54
- 55 9. Inskip PD, Hoover RN, Devesa SS. Brain cancer incidence trends in relation to cellular  
56 telephone use in the United States. *Neuro-oncology*. 2010;12(11):1147-51.  
57
- 58 10. Deltour I, Auvinen A, Feychting M, Johansen C, Klæboe L, Sankila R, et al. Mobile  
59 phone use and incidence of glioma in the Nordic countries 1979-2008: consistency  
60 check. *Epidemiology*. 2012;23(2):301-7.

- 1 11. de Vocht F, Burstyn I, Cherrie JW. Time trends (1998–2007) in brain cancer incidence  
2 rates in relation to mobile phone use in England. *Bioelectromagnetics*.  
3 2011;32(5):334-9.
- 4 12. Kim SJH, Ioannides SJ, Elwood JM. Trends in incidence of primary brain cancer in New  
5 Zealand, 1995 to 2010. *Australian and New Zealand Journal of Public Health*.  
6 2015;39(2):148-52.
- 7 13. Little M, Rajaraman P, Curtis R, Devesa S, Inskip P, Check D, et al. Mobile phone use  
8 and glioma risk: comparison of epidemiological study results with incidence trends in  
9 the United States. *Bmj*. 2012;344:e1147.
- 10 14. Chapman S, Azizi L, Luo Q, Sitas F. Has the incidence of brain cancer risen in Australia  
11 since the introduction of mobile phones 29 years ago? *Cancer epidemiology*.  
12 2016;42:199-205.
- 13 15. Louis DN, Perry A, Reifenberger G, Von Deimling A, Figarella-Branger D, Cavenee WK,  
14 et al. The 2016 World Health Organization classification of tumors of the central  
15 nervous system: a summary. *Acta neuropathologica*. 2016;131(6):803-20.
- 16 16. Jensen P. Cancer registration: principles and methods: *IARC*; 1991.
- 17 17. Castillo M. History and evolution of brain tumor imaging: insights through radiology.  
18 *Radiology*. 2014;273(2S):S111-S25.
- 19 18. ACMA. Communications report 2015–16. 2016.
- 20 19. Ulm K. Simple method to calculate the confidence interval of a standardized mortality  
21 ratio (SMR). *American journal of epidemiology*. 1990;131(2):373-5.
- 22 20. Von Elm E, Altman DG, Egger M, Pocock SJ, Gøtzsche PC, Vandenbroucke JP, et al.  
23 The Strengthening the Reporting of Observational Studies in Epidemiology  
24 (STROBE) statement: guidelines for reporting observational studies. *PLoS medicine*.  
25 2007;4(10):e296.
- 26 21. Alasdair Philips DLH, Graham Lamburn, Michael J O'Carroll. Brain tumours: rise in  
27 Glioblastoma Multiforme incidence in England 1995–2015 suggests an adverse  
28 environmental or lifestyle factor. *Journal of Environment and Public Health*. Forthcoming  
29 2018.
- 30 22. Dobes M, Khurana VG, Shadbolt B, Jain S, Smith SF, Smee R, et al. Increasing  
31 incidence of glioblastoma multiforme and meningioma, and decreasing incidence of  
32 Schwannoma (2000–2008): findings of a multicenter Australian study. *Surgical  
33 neurology international*. 2011;2.
- 34 23. Sanghvi D. Recent advances in imaging of brain tumors. *Indian journal of cancer*.  
35 2009;46(2):82.
- 36 24. Jukich PJ, McCarthy BJ, Surawicz TS, Freels S, Davis FG. Trends in incidence of  
37 primary brain tumors in the United States, 1985-1994. *Neuro-oncology*.  
38 2001;3(3):141-51.
- 39 25. Dubrow R, Darefsky AS. Demographic variation in incidence of adult glioma by subtype,  
40 United States, 1992-2007. *BMC cancer*. 2011;11(1):325.
- 41 26. Barchana M, Margaliot M, Liphshitz I. Changes in brain glioma incidence and laterality  
42 correlates with use of mobile phones-a nationwide population based study in Israel.  
43 *Asian Pacific Journal of Cancer Prevention*. 2012;13(11):5857-63.
- 44 27. Ho VK, Reijneveld JC, Enting RH, Bienfait HP, Robe P, Baumert BG, et al. Changing  
45 incidence and improved survival of gliomas. *European journal of cancer*.  
46 2014;50(13):2309-18.
- 47 28. Radiation UNSCotEoA. Effects of ionizing radiation: UNSCEAR 2006 Report to the  
48 General Assembly, with scientific annexes: *United Nations Publications*; 2009.
- 49 29. Morgan LL, Miller AB, Sasco A, Davis DL. Mobile phone radiation causes brain tumors  
50 and should be classified as a probable human carcinogen (2A). *International journal  
51 of oncology*. 2015;46(5):1865-71.

- 1 30. Condon J, Zhao Y, Armstrong B, Barnes T. Northern Territory Cancer Register data  
2 quality, 1981-2001: NT Cancer Registry, the Cooperative Research Centre for  
3 Aboriginal Health, Charles Darwin University and the Menzies School of Health  
4 Research; 2004.
- 5 31. Forman D, Bray F, Brewster D, Gombe Mbalawa C, Kohler B, Piñeros M, et al. Cancer  
6 incidence in five continents, Vol. X (electronic version) Lyon: IARC. 2013.
- 7 32. Barr ML, Van Ritten JJ, Steel DG, Thackway SV. Inclusion of mobile phone numbers  
8 into an ongoing population health survey in New South Wales, Australia: design,  
9 methods, call outcomes, costs and sample representativeness. *BMC medical  
10 research methodology*. 2012;12(1):177.
- 11 33. Vrijheid M, Cardis E, Armstrong B, Auvinen A, Berg G, Blaasaas K, et al. Validation of  
12 short term recall of mobile phone use for the Interphone study. *Occupational and  
13 environmental medicine*. 2006;63(4):237-43.
- 14 34. Vrijheid M, Armstrong BK, Bédard D, Brown J, Deltour I, Iavarone I, et al. Recall bias in  
15 the assessment of exposure to mobile phones. *Journal of exposure science and  
16 environmental epidemiology*. 2009;19(4):369.
- 17  
18  
19  
20  
21

## 22 **FIGURE LEGENDS**

23 Figure 1. Estimated Percentage of Australian Population Using Mobile Phones

24  
25

26 Figure 2. Observed Incidence Rates (smoothed\*) in adults (both genders, 20-59 years old) during  
27 1982-2013

28  
29

30 Figure 3. Observed (smoothed\*) and predicted (10 year latency) incidence rates in adults (both  
31 genders, 20-59 years old) during 1982-2013

32  
33  
34  
35  
36  
37  
38  
39  
40  
41  
42  
43  
44  
45  
46  
47  
48  
49  
50  
51  
52  
53  
54  
55  
56  
57  
58  
59  
60

1  
2  
3  
4  
5  
6  
7  
8  
9  
10  
11  
12  
13  
14  
15  
16  
17  
18  
19  
20  
21  
22  
23  
24  
25  
26  
27  
28  
29  
30  
31  
32  
33  
34  
35  
36  
37  
38  
39  
40  
41  
42  
43  
44  
45  
46  
47  
48  
49  
50  
51  
52  
53  
54  
55  
56  
57  
58  
59  
60

**Figure 1. Estimated Percentage of Australian Population Using Mobile Phones**

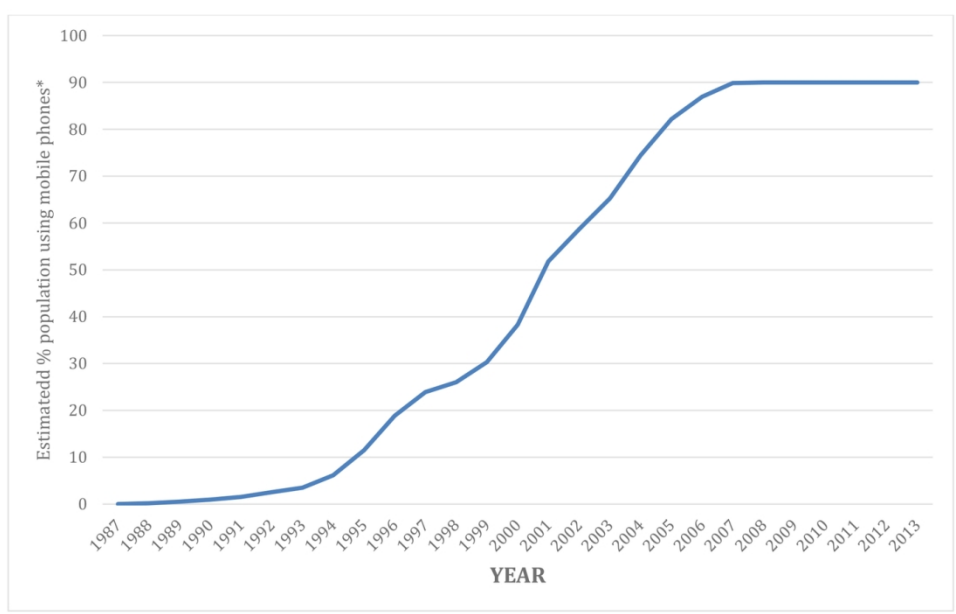

\*Based on subscription information from industry and consumer surveys

Figure 1. Estimated Percentage of Australian Population Using Mobile Phones

127x93mm (300 x 300 DPI)

Figure 2. Observed Incidence Rates (smoothed\*) in adults (both genders, 20-59 years old) during 1982-2013

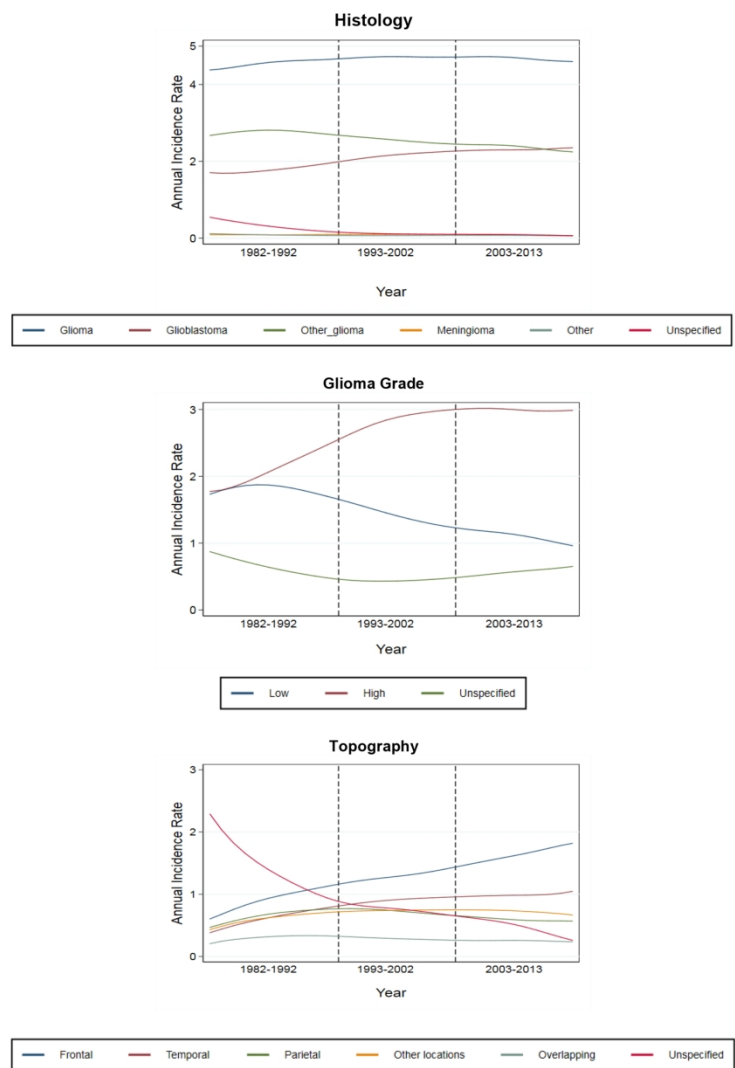

\*Lowess Smoothing

Figure 2. Observed Incidence Rates (smoothed\*) in adults (both genders, 20-59 years old) during 1982-2013

233x346mm (300 x 300 DPI)

**Figure 3. Observed (smoothed\*) and predicted (10 year latency) incidence rates in adults (both genders, 20-59 years old) during 1982-2013**

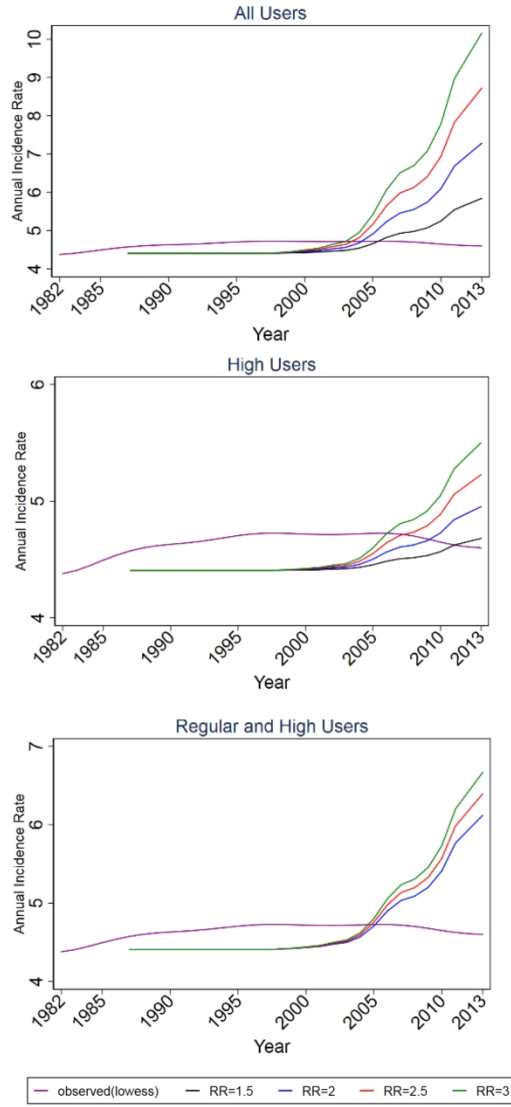

\*Lowess Smoothing

Figure 3. Observed (smoothed\*) and predicted (10 year latency) incidence rates in adults (both genders, 20-59 years old) during 1982-2013

233x322mm (300 x 300 DPI)

Supplementary Figure A. Observed Incidence Rates (smoothed\*) in adults (males and females, 20-59 years old) during 1982-2013

### Histology

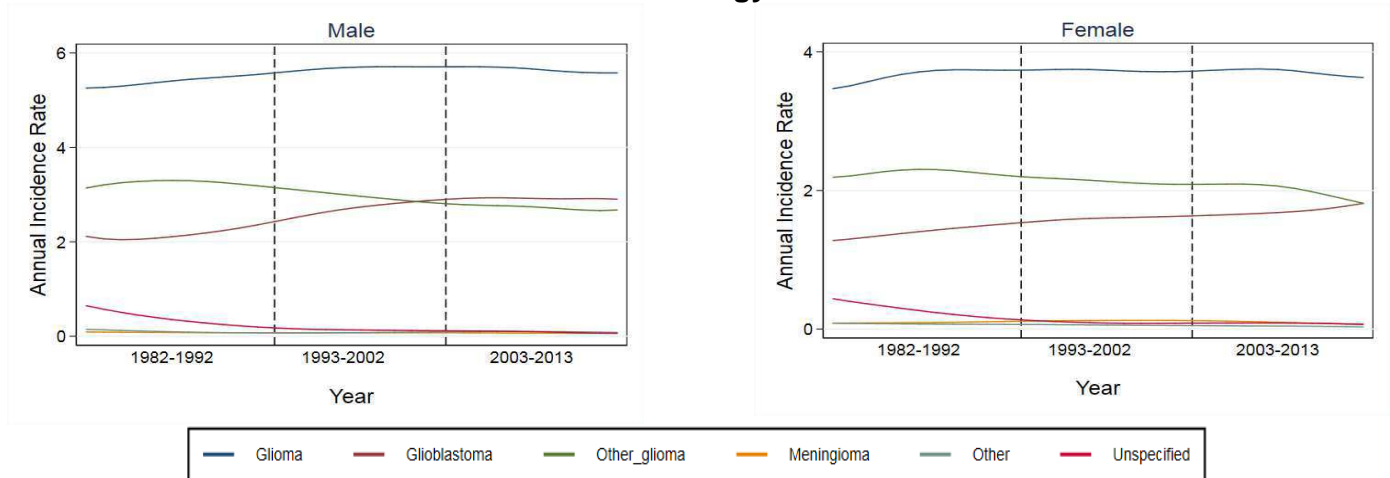

### Glioma Grade

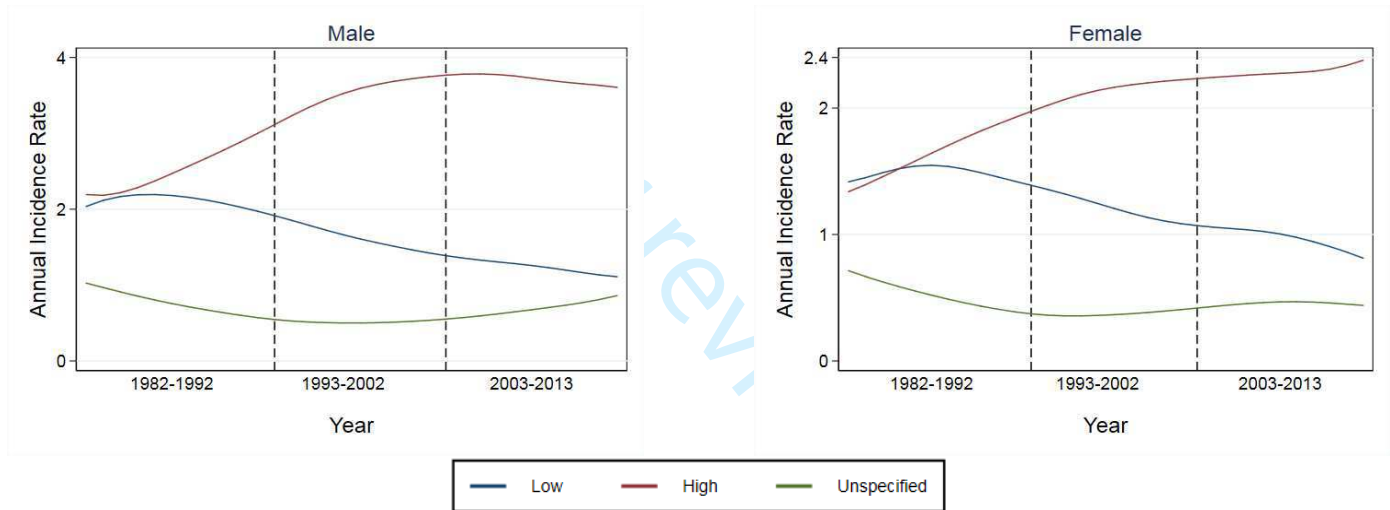

### Topography

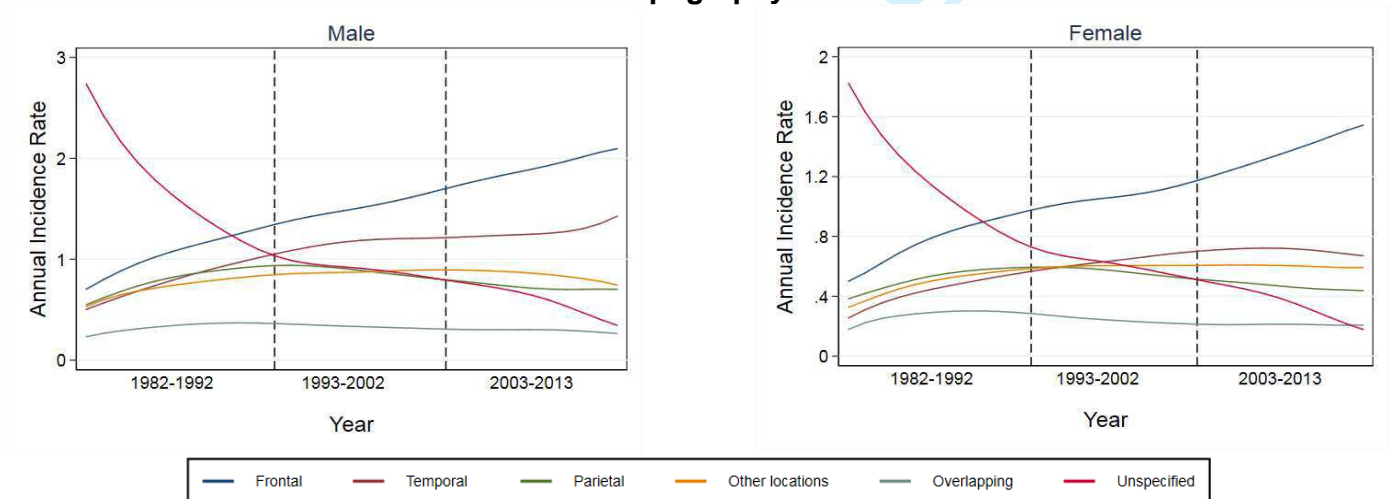

\*Lowess Smoothing

Page 25 of 27  
**Supplementary figure B. Observed (smoothed) and predicted (1, 5, 10, 20 year latency) incidence rates in adults (both genders, 20-59 years old) during 1982-2013**

1  
 2  
 3  
 4  
 5  
 6  
 7  
 8 Latency  
 9 year  
 10  
 11  
 12  
 13  
 14  
 15  
 16  
 17  
 18  
 19  
 20  
 21 Latency  
 22 years  
 23  
 24  
 25  
 26  
 27  
 28  
 29  
 30  
 31  
 32  
 33  
 34  
 35  
 36 Latency  
 37 15 years  
 38  
 39  
 40  
 41  
 42  
 43  
 44  
 45  
 46  
 47  
 48  
 49 Latency  
 50 years  
 51  
 52  
 53  
 54  
 55  
 56  
 57  
 58  
 59  
 60

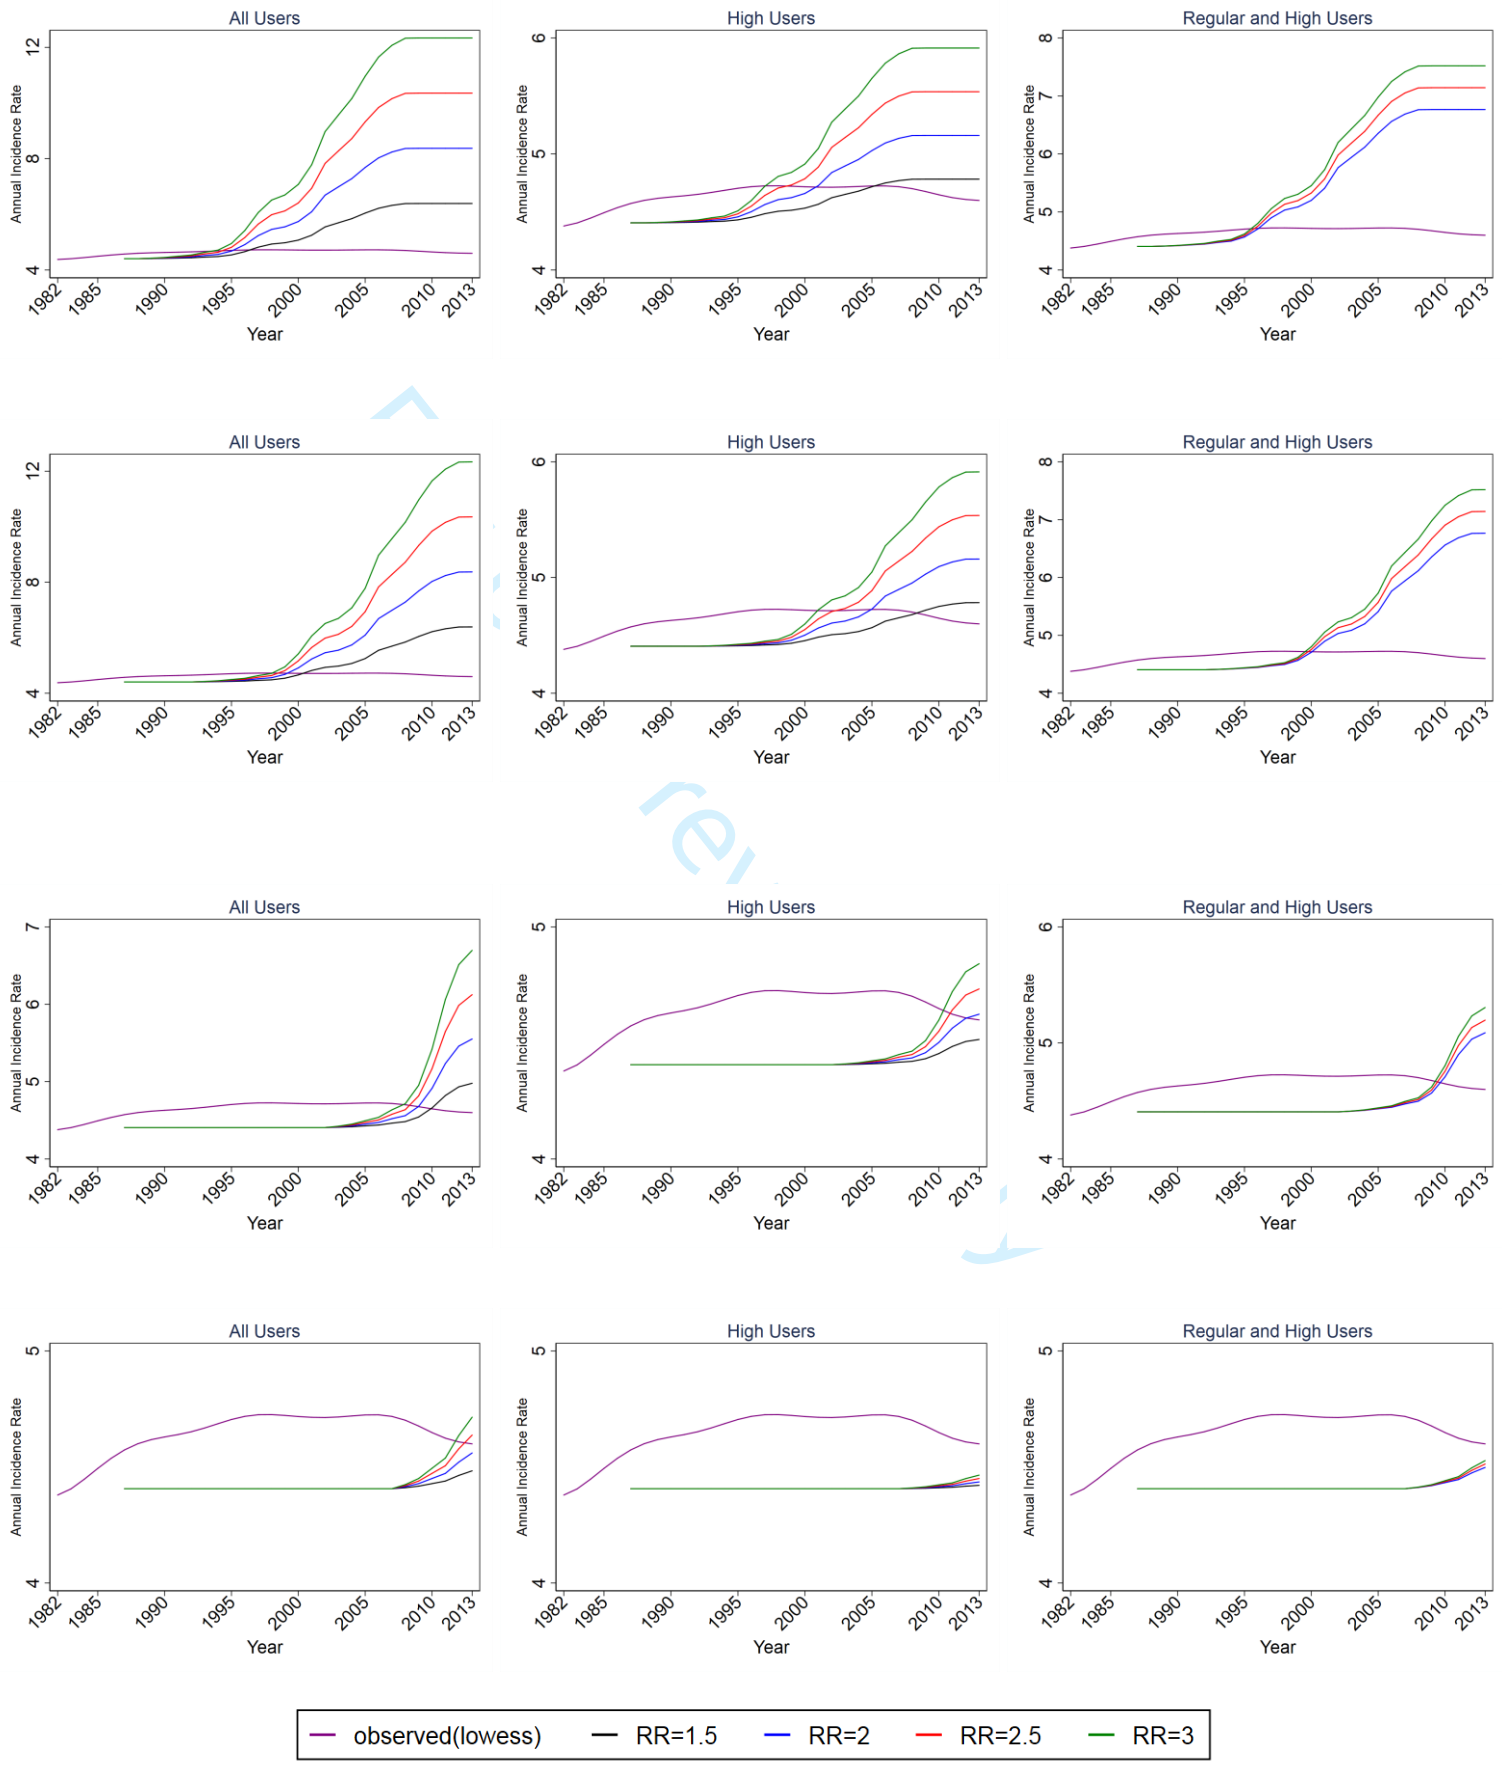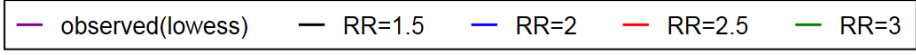

\*Lowess Smoothing



Supplementary Table A. Observed age-standardised brain tumour incidence trends in adults (males and females, 20-59 years old) during increased CT and MRI use (1982-1992), advances in MRI use (1993-2002) and substantial mobile phone use (2003-2013)

|                        | Male      |       |               |           |      |              |           |      |              | Female    |       |              |           |       |              |           |       |              |
|------------------------|-----------|-------|---------------|-----------|------|--------------|-----------|------|--------------|-----------|-------|--------------|-----------|-------|--------------|-----------|-------|--------------|
|                        | 1982-1992 |       |               | 1993-2002 |      |              | 2003-2013 |      |              | 1982-1992 |       |              | 1993-2002 |       |              | 2003-2013 |       |              |
|                        | N         | APC*  | 95% CI        | N         | APC  | 95% CI       | N         | APC  | 95% CI       | N         | APC   | 95% CI       | N         | APC   | 95% CI       | N         | APC   | 95% CI       |
| All                    | 2841      | -0.4  | (-1.5,0.8)    | 3207      | 0.8  | (-0.4,2.1)   | 4035      | -0.5 | (-1.6,0.5)   | 1952      | 0.7   | (-0.7,2.1)   | 2063      | 0.1   | (-1.4,1.6)   | 2727      | -1.2  | (-2.4,0.1)   |
| <b>Histology</b>       |           |       |               |           |      |              |           |      |              |           |       |              |           |       |              |           |       |              |
| Glioma                 | 2597      | 0.8   | (-0.4,2)      | 3064      | 0.7  | (-0.5,2)     | 3857      | -0.3 | (-1.3,0.8)   | 1750      | 1.6   | (0.1,3.1)    | 1926      | -0.1  | (-1.7,1.5)   | 2564      | -1    | (-2.3,0.3)   |
| Glioblastoma           | 996       | 1.1   | (-0.8,3.1)    | 1528      | 3.4  | (1.5,5.3)    | 2083      | 0.6  | (-0.9,2.1)   | 642       | 1.7   | (-0.7,4.2)   | 869       | 0.5   | (-1.9,2.9)   | 1208      | 1.2   | (-0.7,3.2)   |
| Other glioma           | 1601      | 0.6   | (-0.9,2.2)    | 1536      | -1.7 | (-3.4,0)     | 1774      | -1.2 | (-2.7,0.3)   | 1108      | 1.6   | (-0.3,3.5)   | 1057      | -0.5  | (-2.6,1.6)   | 1356      | -2.7  | (-4.4,-1)    |
| Meningioma             | 39        | -2.8  | (-12,7.3)     | 40        | 1.5  | (-9.1,13.4)  | 48        | -1.2 | (-10.3,8.9)  | 43        | 1.8   | (-7.2,11.7)  | 70        | 2.9   | (-5.4,11.8)  | 72        | -6.5  | (-13.8,1.3)  |
| Other                  | 44        | -11.8 | (-19.9,-2.8)  | 36        | 3.7  | (-7.6,16.3)  | 63        | -5.2 | (-12.3,2.5)  | 35        | -1.9  | (-11.5,8.8)  | 30        | -7.5  | (-18.6,5.1)  | 31        | -5.8  | (-16.2,5.9)  |
| Unspecified            | 161       | -15.2 | (-19.5,-10.8) | 67        | 1.9  | (-6.4,10.9)  | 67        | -7.9 | (-15.1,0)    | 124       | -10.9 | (-15.8,-5.8) | 37        | 9.8   | (-2.2,23.2)  | 60        | -1.4  | (-9.4,7.4)   |
| <b>Glioma Grade</b>    |           |       |               |           |      |              |           |      |              |           |       |              |           |       |              |           |       |              |
| Low                    | 1066      | 0.4   | (-1.5,2.3)    | 825       | -4.1 | (-6.4,-1.8)  | 812       | -2.9 | (-5,-0.7)    | 751       | 2.1   | (-0.1,4.5)   | 593       | -3.2  | (-5.9,-0.4)  | 652       | -3.5  | (-5.9,-1)    |
| High                   | 1179      | 3.7   | (1.9,5.6)     | 1987      | 2.9  | (1.2,4.5)    | 2615      | -0.3 | (-1.6,1)     | 759       | 3.8   | (1.5,6.1)    | 1164      | 1     | (-1,3.1)     | 1596      | 0.3   | (-1.4,2)     |
| Unspecified            | 352       | -7.2  | (-10.2,-4.1)  | 252       | 1.2  | (-3.1,5.7)   | 430       | 4.7  | (1.5,8)      | 240       | -6.4  | (-10.1,-2.6) | 169       | 3.7   | (-1.7,9.4)   | 316       | -1.5  | (-5.1,2.1)   |
| <b>Glioma Location</b> |           |       |               |           |      |              |           |      |              |           |       |              |           |       |              |           |       |              |
| Frontal                | 539       | 6.9   | (4,9.8)       | 802       | 4.4  | (1.9,7.1)    | 1252      | 2.9  | (1,4.8)      | 394       | 9.2   | (5.8,12.8)   | 543       | 2.7   | (-0.3,5.9)   | 892       | 3.3   | (1,5.6)      |
| Temporal               | 384       | 7.5   | (4.2,11)      | 655       | 3    | (0.3,5.9)    | 856       | 1.9  | (-0.4,4.3)   | 215       | 6.9   | (2.4,11.6)   | 327       | 2.6   | (-1.2,6.6)   | 515       | -1.9  | (-4.7,1.1)   |
| Parietal               | 404       | 6.8   | (3.5,10.1)    | 495       | -1.1 | (-4.1,2.1)   | 490       | 0.2  | (-2.8,3.3)   | 251       | 5.9   | (1.9,10.2)   | 306       | -1.6  | (-5.5,2.3)   | 326       | -1.3  | (-4.9,2.5)   |
| Other locations        | 358       | 3.8   | (0.4,7.2)     | 473       | 0.6  | (-2.5,3.9)   | 583       | -2   | (-4.6,0.7)   | 247       | 7.2   | (3,11.6)     | 305       | 0.4   | (-3.5,4.4)   | 406       | -1.4  | (-4.6,1.8)   |
| Overlapping            | 167       | 4.9   | (0,10.1)      | 170       | -7.7 | (-12.5,-2.6) | 217       | -2.8 | (-7.1,1.7)   | 131       | 1.9   | (-3.4,7.5)   | 126       | -10.3 | (-15.7,-4.4) | 157       | -1.7  | (-6.9,3.7)   |
| Unspecified            | 745       | -11.4 | (-13.4,-9.3)  | 469       | -3.2 | (-6.3,-0.1)  | 459       | -9.8 | (-12.6,-6.9) | 512       | -10   | (-12.4,-7.4) | 319       | -2.3  | (-6,1.6)     | 268       | -11.6 | (-15.2,-7.8) |

\*APC = Annual percent change

Supplementary Table B. Observed age-standardised brain tumour incidence trends in adults (males and females, 20-59 years old) after redistribution of unclassified tumours

|                          | Male      |       |              |           |      |             |           |      |             | Female    |      |             |           |      |             |           |      |             |
|--------------------------|-----------|-------|--------------|-----------|------|-------------|-----------|------|-------------|-----------|------|-------------|-----------|------|-------------|-----------|------|-------------|
|                          | 1982-1992 |       |              | 1993-2002 |      |             | 2003-2013 |      |             | 1982-1992 |      |             | 1993-2002 |      |             | 2003-2013 |      |             |
|                          | N         | APC*  | 95% CI       | N         | APC  | 95% CI      | N         | APC  | 95% CI      | N         | APC  | 95% CI      | N         | APC  | 95% CI      | N         | APC  | 95% CI      |
| All                      | 2841      | -0.4  | (-1.5,0.8)   | 3207      | 0.8  | (-0.4,2.1)  | 4035      | -0.5 | (-1.6,0.5)  | 1952      | 0.7  | (-0.7,2.1)  | 2063      | 0.1  | (-1.4,1.6)  | 2727      | -1.2 | (-2.4,0.1)  |
| <b>Histology</b>         |           |       |              |           |      |             |           |      |             |           |      |             |           |      |             |           |      |             |
| Glioma                   | 2755      | -0.1  | (-1.3,1.1)   | 3131      | 0.8  | (-0.5,2)    | 3924      | -0.4 | (-1.5,0.6)  | 1868      | 0.8  | (-0.6,2.2)  | 1963      | 0.1  | (-1.5,1.7)  | 2623      | -1   | (-2.3,0.3)  |
| Glioblastoma             | 1059      | 0.1   | (-1.8,2)     | 1560      | 3.4  | (1.6,5.3)   | 2118      | 0.4  | (-1,1.9)    | 687       | 0.9  | (-1.5,3.2)  | 885       | 0.6  | (-1.7,3)    | 1235      | 1.2  | (-0.7,3.2)  |
| Other glioma             | 1699      | -0.3  | (-1.8,1.2)   | 1571      | -1.7 | (-3.4,0)    | 1806      | -1.3 | (-2.8,0.2)  | 1187      | 0.7  | (-1.1,2.5)  | 1078      | -0.3 | (-2.4,1.8)  | 1389      | -2.7 | (-4.4,-1)   |
| Meningioma               | 40        | -4.1  | (-13,5.8)    | 40        | 1.5  | (-9.1,13.4) | 48        | -1.2 | (-10.3,8.9) | 44        | 0.7  | (-8.1,10.4) | 70        | 2.9  | (-5.4,11.8) | 72        | -6.5 | (-13.8,1.3) |
| Other                    | 46        | -12.9 | (-20.8,-4.1) | 36        | 3.7  | (-7.6,16.3) | 63        | -5.2 | (-12.3,2.5) | 36        | -3.2 | (-12.6,7.2) | 30        | -7.5 | (-18.6,5.1) | 31        | -5.8 | (-16.2,5.9) |
| <b>Glioma Grade</b>      |           |       |              |           |      |             |           |      |             |           |      |             |           |      |             |           |      |             |
| Low                      | 1236      | -0.8  | (-2.5,0.9)   | 899       | -4.1 | (-6.3,-1.9) | 914       | -2.2 | (-4.3,-0.2) | 871       | 0.7  | (-1.4,2.9)  | 649       | -2.9 | (-5.5,-0.3) | 745       | -3.5 | (-5.7,-1.2) |
| High                     | 1361      | 2.3   | (0.6,4)      | 2165      | 2.9  | (1.4,4.5)   | 2943      | 0.3  | (-0.9,1.6)  | 879       | 2.5  | (0.4,4.6)   | 1277      | 1.4  | (-0.5,3.4)  | 1819      | 0.1  | (-1.4,1.7)  |
| <b>Glioma Topography</b> |           |       |              |           |      |             |           |      |             |           |      |             |           |      |             |           |      |             |
| Frontal                  | 827       | 1.1   | (-1.1,3.2)   | 1013      | 3    | (0.8,5.3)   | 1515      | 1.4  | (-0.3,3.1)  | 620       | 2.9  | (0.4,5.5)   | 706       | 1.4  | (-1.3,4)    | 1065      | 1.9  | (-0.1,4)    |
| Temporal                 | 591       | 2     | (-0.5,4.7)   | 827       | 1.6  | (-0.8,4.1)  | 1036      | 0.2  | (-1.9,2.3)  | 338       | 1.4  | (-2,4.8)    | 425       | 1.3  | (-2.1,4.8)  | 620       | -3.4 | (-5.9,-0.7) |
| Parietal                 | 404       | 6.8   | (3.5,10.1)   | 495       | -1.1 | (-4.1,2.1)  | 490       | 0.2  | (-2.8,3.3)  | 399       | 0.2  | (-2.8,3.3)  | 399       | -3.1 | (-6.4,0.3)  | 390       | -2.7 | (-6,0.6)    |
| Other locations          | 556       | -1.5  | (-4.1,1.1)   | 599       | -0.8 | (-3.6,2.1)  | 710       | -3.5 | (-5.8,-1)   | 392       | 1    | (-2.1,4.2)  | 397       | -0.9 | (-4.3,2.6)  | 488       | -3   | (-5.9,-0.1) |

\*APC = Annual percent change

**STROBE Statement—checklist of items that should be included in reports of observational studies**

|                           | <b>Item No</b> | <b>Recommendation</b>                                                                                                                                                                | <b>Met</b> | <b>Page</b> | <b>If not met, reasons why not</b>                                                                                                                                                                                                                                         |
|---------------------------|----------------|--------------------------------------------------------------------------------------------------------------------------------------------------------------------------------------|------------|-------------|----------------------------------------------------------------------------------------------------------------------------------------------------------------------------------------------------------------------------------------------------------------------------|
| <b>Title and abstract</b> | 1              | (a) Indicate the study's design with a commonly used term in the title or the abstract                                                                                               | Yes        | 1           |                                                                                                                                                                                                                                                                            |
|                           |                | (b) Provide in the abstract an informative and balanced summary of what was done and what was found                                                                                  | Yes        | 2           |                                                                                                                                                                                                                                                                            |
| <b>Introduction</b>       |                |                                                                                                                                                                                      |            |             |                                                                                                                                                                                                                                                                            |
| Background/rationale      | 2              | Explain the scientific background and rationale for the investigation being reported                                                                                                 | Yes        | 4           |                                                                                                                                                                                                                                                                            |
| Objectives                | 3              | State specific objectives, including any prespecified hypotheses                                                                                                                     | Yes        | 4           |                                                                                                                                                                                                                                                                            |
| <b>Methods</b>            |                |                                                                                                                                                                                      |            |             |                                                                                                                                                                                                                                                                            |
| Study design              | 4              | Present key elements of study design early in the paper                                                                                                                              | Yes        | 4-5         |                                                                                                                                                                                                                                                                            |
| Setting                   | 5              | Describe the setting, locations, and relevant dates, including periods of recruitment, exposure, follow-up, and data collection                                                      | Yes        | 4-5         |                                                                                                                                                                                                                                                                            |
| Participants              | 6              | <i>Cross-sectional study</i> —Give the eligibility criteria, and the sources and methods of selection of participants                                                                | Yes        | 4-5         | This was an ecological study and details on the population used (not the participants) were provided                                                                                                                                                                       |
| Variables                 | 7              | Clearly define all outcomes, exposures, predictors, potential confounders, and effect modifiers. Give diagnostic criteria, if applicable                                             | Yes        | 5-6         |                                                                                                                                                                                                                                                                            |
| Data sources/measurement  | 8              | For each variable of interest, give sources of data and details of methods of assessment (measurement). Describe comparability of assessment methods if there is more than one group | Yes        | 4-5         |                                                                                                                                                                                                                                                                            |
| Bias                      | 9              | Describe any efforts to address potential sources of bias                                                                                                                            | No         |             | The study used all the available brain tumour data through Australia's high quality state and territory population-based cancer registration system. Other biases stemming from the inherent nature of the ecological study design are described in the Discussion section |
| Study size                | 10             | Explain how the study size was arrived at                                                                                                                                            | Yes        | 4-5         |                                                                                                                                                                                                                                                                            |
| Quantitative variables    | 11             | Explain how quantitative variables were handled in the analyses. If applicable, describe which groupings were chosen and why                                                         | Yes        | 5           |                                                                                                                                                                                                                                                                            |

|    |                     |    |                                                                                                                                                                                                              |     |     |                                                                                                                                               |
|----|---------------------|----|--------------------------------------------------------------------------------------------------------------------------------------------------------------------------------------------------------------|-----|-----|-----------------------------------------------------------------------------------------------------------------------------------------------|
| 1  |                     |    |                                                                                                                                                                                                              |     |     |                                                                                                                                               |
| 2  |                     |    |                                                                                                                                                                                                              |     |     |                                                                                                                                               |
| 3  | Statistical methods | 12 | (a) Describe all statistical methods, including those used to control for confounding                                                                                                                        | Yes | 5-6 | This was an ecological study that did not consider confounding                                                                                |
| 4  |                     |    | (b) Describe any methods used to examine subgroups and interactions                                                                                                                                          | Yes | 5-6 |                                                                                                                                               |
| 5  |                     |    | (c) Explain how missing data were addressed                                                                                                                                                                  | Yes | 5   |                                                                                                                                               |
| 6  |                     |    | (d) <i>Cross-sectional study</i> —If applicable, describe analytical methods taking account of sampling strategy                                                                                             | N/A |     |                                                                                                                                               |
| 7  |                     |    | (e) Describe any sensitivity analyses                                                                                                                                                                        | Yes | 6   |                                                                                                                                               |
| 8  | <b>Results</b>      |    |                                                                                                                                                                                                              |     |     |                                                                                                                                               |
| 9  | Participants        | 13 | (a) Report numbers of individuals at each stage of study—eg numbers potentially eligible, examined for eligibility, confirmed eligible, included in the study, completing follow-up, and analysed            | Yes | 6-7 | This was an ecological study and population numbers were reported                                                                             |
| 10 |                     |    | (b) Give reasons for non-participation at each stage                                                                                                                                                         | N/A |     | This is not relevant for this study (all potentially available persons were included in the analysis).                                        |
| 11 |                     |    | (c) Consider use of a flow diagram                                                                                                                                                                           | N/A |     | This is not relevant for this study (all potentially available persons were included in the analysis).                                        |
| 12 | Descriptive data    | 14 | (a) Give characteristics of study participants (eg demographic, clinical, social) and information on exposures and potential confounders                                                                     | Yes | 6-7 |                                                                                                                                               |
| 13 |                     |    | (b) Indicate number of participants with missing data for each variable of interest                                                                                                                          | N/A |     | None of the included participants had missing data. There was no available data for one Australian state (New South Wales) for the year 2013. |
| 14 | Outcome data        | 15 | <i>Cross-sectional study</i> —Report numbers of outcome events or summary measures                                                                                                                           | Yes | 7-9 |                                                                                                                                               |
| 15 | Main results        | 16 | (a) Give unadjusted estimates and, if applicable, confounder-adjusted estimates and their precision (eg, 95% confidence interval). Make clear which confounders were adjusted for and why they were included | No  |     | Giving estimates unadjusted for age will result in biased results                                                                             |
| 16 |                     |    | (b) Report category boundaries when continuous variables were categorized                                                                                                                                    | N/A |     |                                                                                                                                               |
| 17 |                     |    | (c) If relevant, consider translating estimates of relative risk into absolute risk for a meaningful time period                                                                                             | N/A |     |                                                                                                                                               |

|                   |    |                                                                                                                                                                            |     |       |
|-------------------|----|----------------------------------------------------------------------------------------------------------------------------------------------------------------------------|-----|-------|
| Other analyses    | 17 | Report other analyses done—eg analyses of subgroups and interactions, and sensitivity analyses                                                                             | Yes | 7-9   |
| <b>Discussion</b> |    |                                                                                                                                                                            |     |       |
| Key results       | 18 | Summarise key results with reference to study objectives                                                                                                                   | Yes | 10    |
| Limitations       | 19 | Discuss limitations of the study, taking into account sources of potential bias or imprecision. Discuss both direction and magnitude of any potential bias                 | Yes | 11-12 |
| Interpretation    | 20 | Give a cautious overall interpretation of results considering objectives, limitations, multiplicity of analyses, results from similar studies, and other relevant evidence | Yes | 12    |
| Generalisability  | 21 | Discuss the generalisability (external validity) of the study results                                                                                                      | Yes | 12    |
| Funding           | 22 | Give the source of funding and the role of the funders for the present study and, if applicable, for the original study on which the present article is based              | Yes | 12    |

1  
2  
3  
4  
5  
6  
7  
8  
9  
10  
11  
12  
13  
14  
15  
16  
17  
18  
19  
20  
21  
22  
23  
24  
25  
26  
27  
28  
29  
30  
31  
32  
33  
34  
35  
36  
37  
38  
39  
40  
41  
42  
43  
44  
45  
46

For peer review only
