# Supplementary material for: Mobile phone use and incidence of brain tumour histological types, grading or anatomical location: a population-based ecological study
Source: PubMed Central journal article supplement — BMJ Open. 2018 Dec 9;8(12):e024489. doi: 10.1136/bmjopen-2018-024489 (PMC6292417; doi:10.1136/bmjopen-2018-024489), 2018-12-09
Supplement: bmjopen-2018-024489supp001.pdf [file bmjopen-2018-024489supp001.pdf]

**Supplementary Figure A. Observed Incidence Rates (smoothed\*) in adults (males and females, 20-59 years old) during 1982-2013**

### Histology

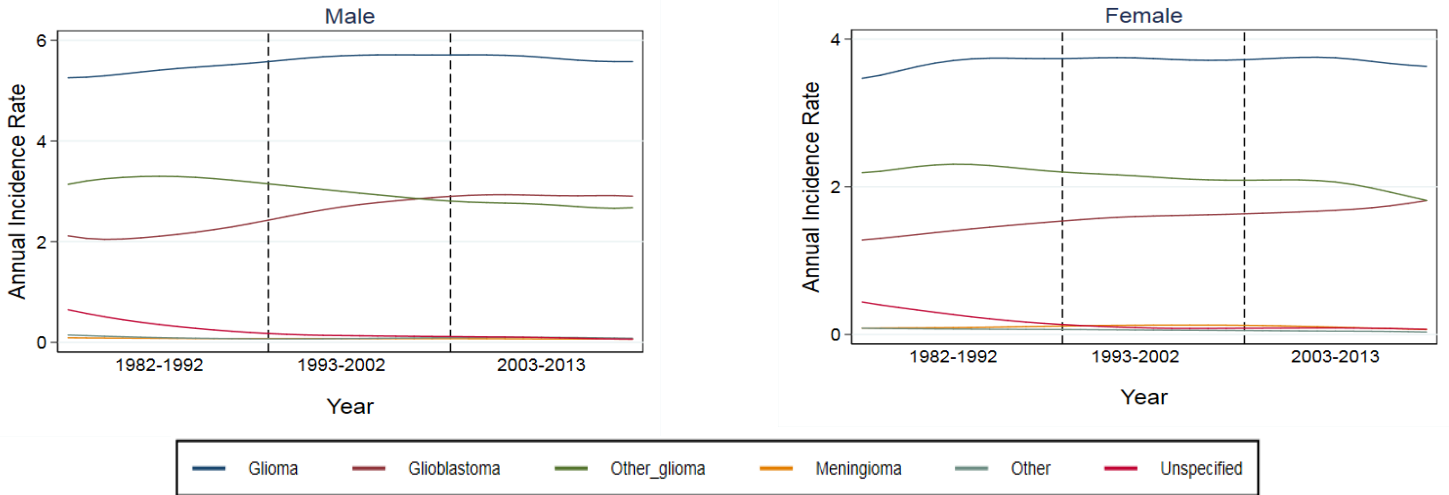

### Glioma Grade

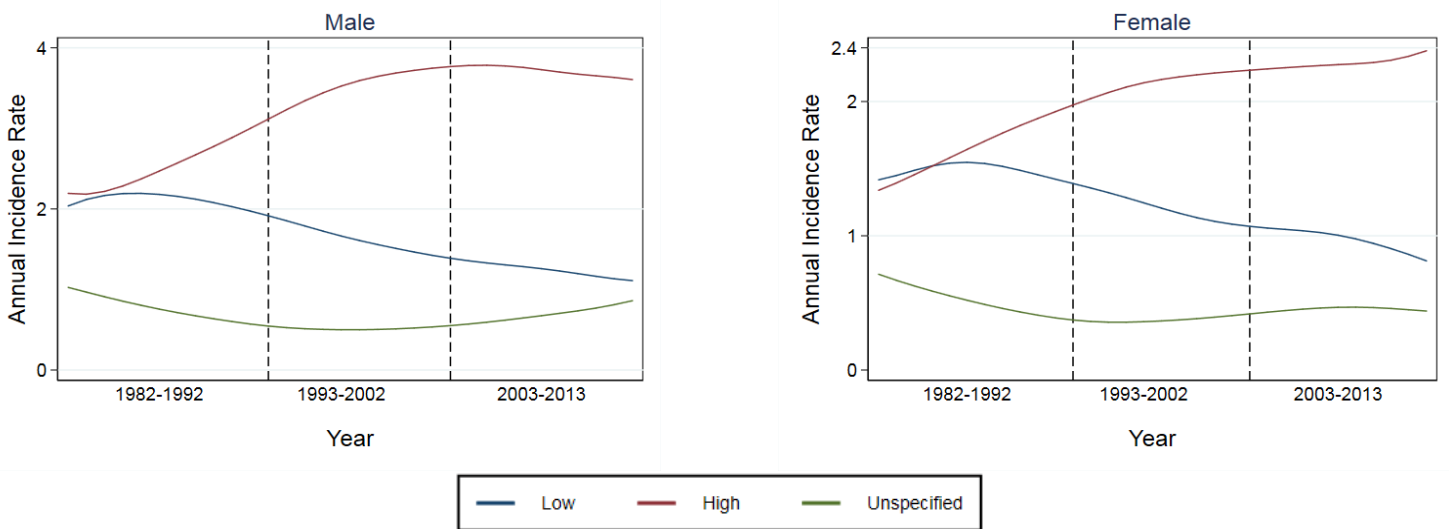

### Topography

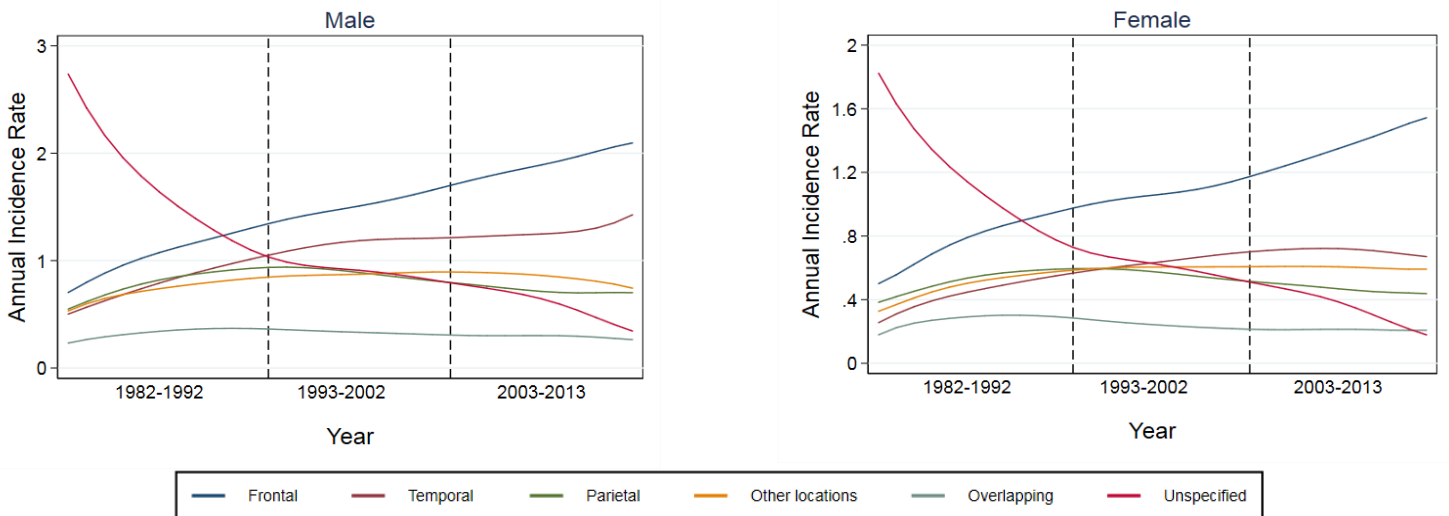

\*Lowess Smoothing
