# Supplementary material for: Mobile phone use and incidence of brain tumour histological types, grading or anatomical location: a population-based ecological study
Source: PubMed Central journal article supplement — BMJ Open. 2018 Dec 9;8(12):e024489. doi: 10.1136/bmjopen-2018-024489 (PMC6292417; doi:10.1136/bmjopen-2018-024489), 2018-12-09
Supplement: bmjopen-2018-024489supp002.pdf [file bmjopen-2018-024489supp002.pdf]

**Supplementary Table A. Observed age-standardised brain tumour incidence trends in adults (males and females, 20-59 years old) during increased CT and MRI use (1982-1992), advances in MRI use (1993-2002) and substantial mobile phone use (2003-2013)**

|                        | Male      |       |               |           |      |              |           |      |              | Female    |       |              |           |       |              |           |       |              |
|------------------------|-----------|-------|---------------|-----------|------|--------------|-----------|------|--------------|-----------|-------|--------------|-----------|-------|--------------|-----------|-------|--------------|
|                        | 1982-1992 |       |               | 1993-2002 |      |              | 2003-2013 |      |              | 1982-1992 |       |              | 1993-2002 |       |              | 2003-2013 |       |              |
|                        | N         | APC*  | 95% CI        | N         | APC  | 95% CI       | N         | APC  | 95% CI       | N         | APC   | 95% CI       | N         | APC   | 95% CI       | N         | APC   | 95% CI       |
| All                    | 2841      | -0.4  | (-1.5,0.8)    | 3207      | 0.8  | (-0.4,2.1)   | 4035      | -0.5 | (-1.6,0.5)   | 1952      | 0.7   | (-0.7,2.1)   | 2063      | 0.1   | (-1.4,1.6)   | 2727      | -1.2  | (-2.4,0.1)   |
| <b>Histology</b>       |           |       |               |           |      |              |           |      |              |           |       |              |           |       |              |           |       |              |
| Glioma                 | 2597      | 0.8   | (-0.4,2)      | 3064      | 0.7  | (-0.5,2)     | 3857      | -0.3 | (-1.3,0.8)   | 1750      | 1.6   | (0.1,3.1)    | 1926      | -0.1  | (-1.7,1.5)   | 2564      | -1    | (-2.3,0.3)   |
| Glioblastoma           | 996       | 1.1   | (-0.8,3.1)    | 1528      | 3.4  | (1.5,5.3)    | 2083      | 0.6  | (-0.9,2.1)   | 642       | 1.7   | (-0.7,4.2)   | 869       | 0.5   | (-1.9,2.9)   | 1208      | 1.2   | (-0.7,3.2)   |
| Other glioma           | 1601      | 0.6   | (-0.9,2.2)    | 1536      | -1.7 | (-3.4,0)     | 1774      | -1.2 | (-2.7,0.3)   | 1108      | 1.6   | (-0.3,3.5)   | 1057      | -0.5  | (-2.6,1.6)   | 1356      | -2.7  | (-4.4,-1)    |
| Meningioma             | 39        | -2.8  | (-12,7.3)     | 40        | 1.5  | (-9.1,13.4)  | 48        | -1.2 | (-10.3,8.9)  | 43        | 1.8   | (-7.2,11.7)  | 70        | 2.9   | (-5.4,11.8)  | 72        | -6.5  | (-13.8,1.3)  |
| Other                  | 44        | -11.8 | (-19.9,-2.8)  | 36        | 3.7  | (-7.6,16.3)  | 63        | -5.2 | (-12.3,2.5)  | 35        | -1.9  | (-11.5,8.8)  | 30        | -7.5  | (-18.6,5.1)  | 31        | -5.8  | (-16.2,5.9)  |
| Unspecified            | 161       | -15.2 | (-19.5,-10.8) | 67        | 1.9  | (-6.4,10.9)  | 67        | -7.9 | (-15.1,0)    | 124       | -10.9 | (-15.8,-5.8) | 37        | 9.8   | (-2.2,23.2)  | 60        | -1.4  | (-9.4,7.4)   |
| <b>Glioma Grade</b>    |           |       |               |           |      |              |           |      |              |           |       |              |           |       |              |           |       |              |
| Low                    | 1066      | 0.4   | (-1.5,2.3)    | 825       | -4.1 | (-6.4,-1.8)  | 812       | -2.9 | (-5,-0.7)    | 751       | 2.1   | (-0.1,4.5)   | 593       | -3.2  | (-5.9,-0.4)  | 652       | -3.5  | (-5.9,-1)    |
| High                   | 1179      | 3.7   | (1.9,5.6)     | 1987      | 2.9  | (1.2,4.5)    | 2615      | -0.3 | (-1.6,1)     | 759       | 3.8   | (1.5,6.1)    | 1164      | 1     | (-1,3.1)     | 1596      | 0.3   | (-1.4,2)     |
| Unspecified            | 352       | -7.2  | (-10.2,-4.1)  | 252       | 1.2  | (-3.1,5.7)   | 430       | 4.7  | (1.5,8)      | 240       | -6.4  | (-10.1,-2.6) | 169       | 3.7   | (-1.7,9.4)   | 316       | -1.5  | (-5.1,2.1)   |
| <b>Glioma Location</b> |           |       |               |           |      |              |           |      |              |           |       |              |           |       |              |           |       |              |
| Frontal                | 539       | 6.9   | (4,9.8)       | 802       | 4.4  | (1.9,7.1)    | 1252      | 2.9  | (1,4.8)      | 394       | 9.2   | (5.8,12.8)   | 543       | 2.7   | (-0.3,5.9)   | 892       | 3.3   | (1,5.6)      |
| Temporal               | 384       | 7.5   | (4.2,11)      | 655       | 3    | (0.3,5.9)    | 856       | 1.9  | (-0.4,4.3)   | 215       | 6.9   | (2.4,11.6)   | 327       | 2.6   | (-1.2,6.6)   | 515       | -1.9  | (-4.7,1.1)   |
| Parietal               | 404       | 6.8   | (3.5,10.1)    | 495       | -1.1 | (-4.1,2.1)   | 490       | 0.2  | (-2.8,3.3)   | 251       | 5.9   | (1.9,10.2)   | 306       | -1.6  | (-5.5,2.3)   | 326       | -1.3  | (-4.9,2.5)   |
| Other locations        | 358       | 3.8   | (0.4,7.2)     | 473       | 0.6  | (-2.5,3.9)   | 583       | -2   | (-4.6,0.7)   | 247       | 7.2   | (3,11.6)     | 305       | 0.4   | (-3.5,4.4)   | 406       | -1.4  | (-4.6,1.8)   |
| Overlapping            | 167       | 4.9   | (0,10.1)      | 170       | -7.7 | (-12.5,-2.6) | 217       | -2.8 | (-7.1,1.7)   | 131       | 1.9   | (-3.4,7.5)   | 126       | -10.3 | (-15.7,-4.4) | 157       | -1.7  | (-6.9,3.7)   |
| Unspecified            | 745       | -11.4 | (-13.4,-9.3)  | 469       | -3.2 | (-6.3,-0.1)  | 459       | -9.8 | (-12.6,-6.9) | 512       | -10   | (-12.4,-7.4) | 319       | -2.3  | (-6,1.6)     | 268       | -11.6 | (-15.2,-7.8) |

\*APC = Annual percent change

**Supplementary Table B. Observed age-standardised brain tumour incidence trends in adults (males and females, 20-59 years old) after redistribution of unclassified tumours**

|                          | Male      |       |              |           |      |             |           |      |             | Female    |      |             |           |      |             |           |      |             |
|--------------------------|-----------|-------|--------------|-----------|------|-------------|-----------|------|-------------|-----------|------|-------------|-----------|------|-------------|-----------|------|-------------|
|                          | 1982-1992 |       |              | 1993-2002 |      |             | 2003-2013 |      |             | 1982-1992 |      |             | 1993-2002 |      |             | 2003-2013 |      |             |
|                          | N         | APC*  | 95% CI       | N         | APC  | 95% CI      | N         | APC  | 95% CI      | N         | APC  | 95% CI      | N         | APC  | 95% CI      | N         | APC  | 95% CI      |
| All                      | 2841      | -0.4  | (-1.5,0.8)   | 3207      | 0.8  | (-0.4,2.1)  | 4035      | -0.5 | (-1.6,0.5)  | 1952      | 0.7  | (-0.7,2.1)  | 2063      | 0.1  | (-1.4,1.6)  | 2727      | -1.2 | (-2.4,0.1)  |
| <b>Histology</b>         |           |       |              |           |      |             |           |      |             |           |      |             |           |      |             |           |      |             |
| Glioma                   | 2755      | -0.1  | (-1.3,1.1)   | 3131      | 0.8  | (-0.5,2)    | 3924      | -0.4 | (-1.5,0.6)  | 1868      | 0.8  | (-0.6,2.2)  | 1963      | 0.1  | (-1.5,1.7)  | 2623      | -1   | (-2.3,0.3)  |
| Glioblastoma             | 1059      | 0.1   | (-1.8,2)     | 1560      | 3.4  | (1.6,5.3)   | 2118      | 0.4  | (-1,1.9)    | 687       | 0.9  | (-1.5,3.2)  | 885       | 0.6  | (-1.7,3)    | 1235      | 1.2  | (-0.7,3.2)  |
| Other glioma             | 1699      | -0.3  | (-1.8,1.2)   | 1571      | -1.7 | (-3.4,0)    | 1806      | -1.3 | (-2.8,0.2)  | 1187      | 0.7  | (-1.1,2.5)  | 1078      | -0.3 | (-2.4,1.8)  | 1389      | -2.7 | (-4.4,-1)   |
| Meningioma               | 40        | -4.1  | (-13,5.8)    | 40        | 1.5  | (-9.1,13.4) | 48        | -1.2 | (-10.3,8.9) | 44        | 0.7  | (-8.1,10.4) | 70        | 2.9  | (-5.4,11.8) | 72        | -6.5 | (-13.8,1.3) |
| Other                    | 46        | -12.9 | (-20.8,-4.1) | 36        | 3.7  | (-7.6,16.3) | 63        | -5.2 | (-12.3,2.5) | 36        | -3.2 | (-12.6,7.2) | 30        | -7.5 | (-18.6,5.1) | 31        | -5.8 | (-16.2,5.9) |
| <b>Glioma Grade</b>      |           |       |              |           |      |             |           |      |             |           |      |             |           |      |             |           |      |             |
| Low                      | 1236      | -0.8  | (-2.5,0.9)   | 899       | -4.1 | (-6.3,-1.9) | 914       | -2.2 | (-4.3,-0.2) | 871       | 0.7  | (-1.4,2.9)  | 649       | -2.9 | (-5.5,-0.3) | 745       | -3.5 | (-5.7,-1.2) |
| High                     | 1361      | 2.3   | (0.6,4)      | 2165      | 2.9  | (1.4,4.5)   | 2943      | 0.3  | (-0.9,1.6)  | 879       | 2.5  | (0.4,4.6)   | 1277      | 1.4  | (-0.5,3.4)  | 1819      | 0.1  | (-1.4,1.7)  |
| <b>Glioma Topography</b> |           |       |              |           |      |             |           |      |             |           |      |             |           |      |             |           |      |             |
| Frontal                  | 827       | 1.1   | (-1.1,3.2)   | 1013      | 3    | (0.8,5.3)   | 1515      | 1.4  | (-0.3,3.1)  | 620       | 2.9  | (0.4,5.5)   | 706       | 1.4  | (-1.3,4)    | 1065      | 1.9  | (-0.1,4)    |
| Temporal                 | 591       | 2     | (-0.5,4.7)   | 827       | 1.6  | (-0.8,4.1)  | 1036      | 0.2  | (-1.9,2.3)  | 338       | 1.4  | (-2,4.8)    | 425       | 1.3  | (-2.1,4.8)  | 620       | -3.4 | (-5.9,-0.7) |
| Parietal                 | 404       | 6.8   | (3.5,10.1)   | 495       | -1.1 | (-4.1,2.1)  | 490       | 0.2  | (-2.8,3.3)  | 399       | 0.2  | (-2.8,3.3)  | 399       | -3.1 | (-6.4,0.3)  | 390       | -2.7 | (-6,0.6)    |
| Other locations          | 556       | -1.5  | (-4.1,1.1)   | 599       | -0.8 | (-3.6,2.1)  | 710       | -3.5 | (-5.8,-1)   | 392       | 1    | (-2.1,4.2)  | 397       | -0.9 | (-4.3,2.6)  | 488       | -3   | (-5.9,-0.1) |

\*APC = Annual percent change
