# Supplementary material for: Mobile phone use and incidence of brain tumour histological types, grading or anatomical location: a population-based ecological study
Source: PubMed Central journal article supplement — BMJ Open. 2018 Dec 9;8(12):e024489. doi: 10.1136/bmjopen-2018-024489 (PMC6292417; doi:10.1136/bmjopen-2018-024489), 2018-12-09
Supplement: bmjopen-2018-024489supp003.pdf [file bmjopen-2018-024489supp003.pdf]

# Supplementary figure B. Observed (smoothed\*) and predicted (1, 5, 10, 20 year latency) incidence rates in adults (both genders, 20-59 years old) during 1982-2013

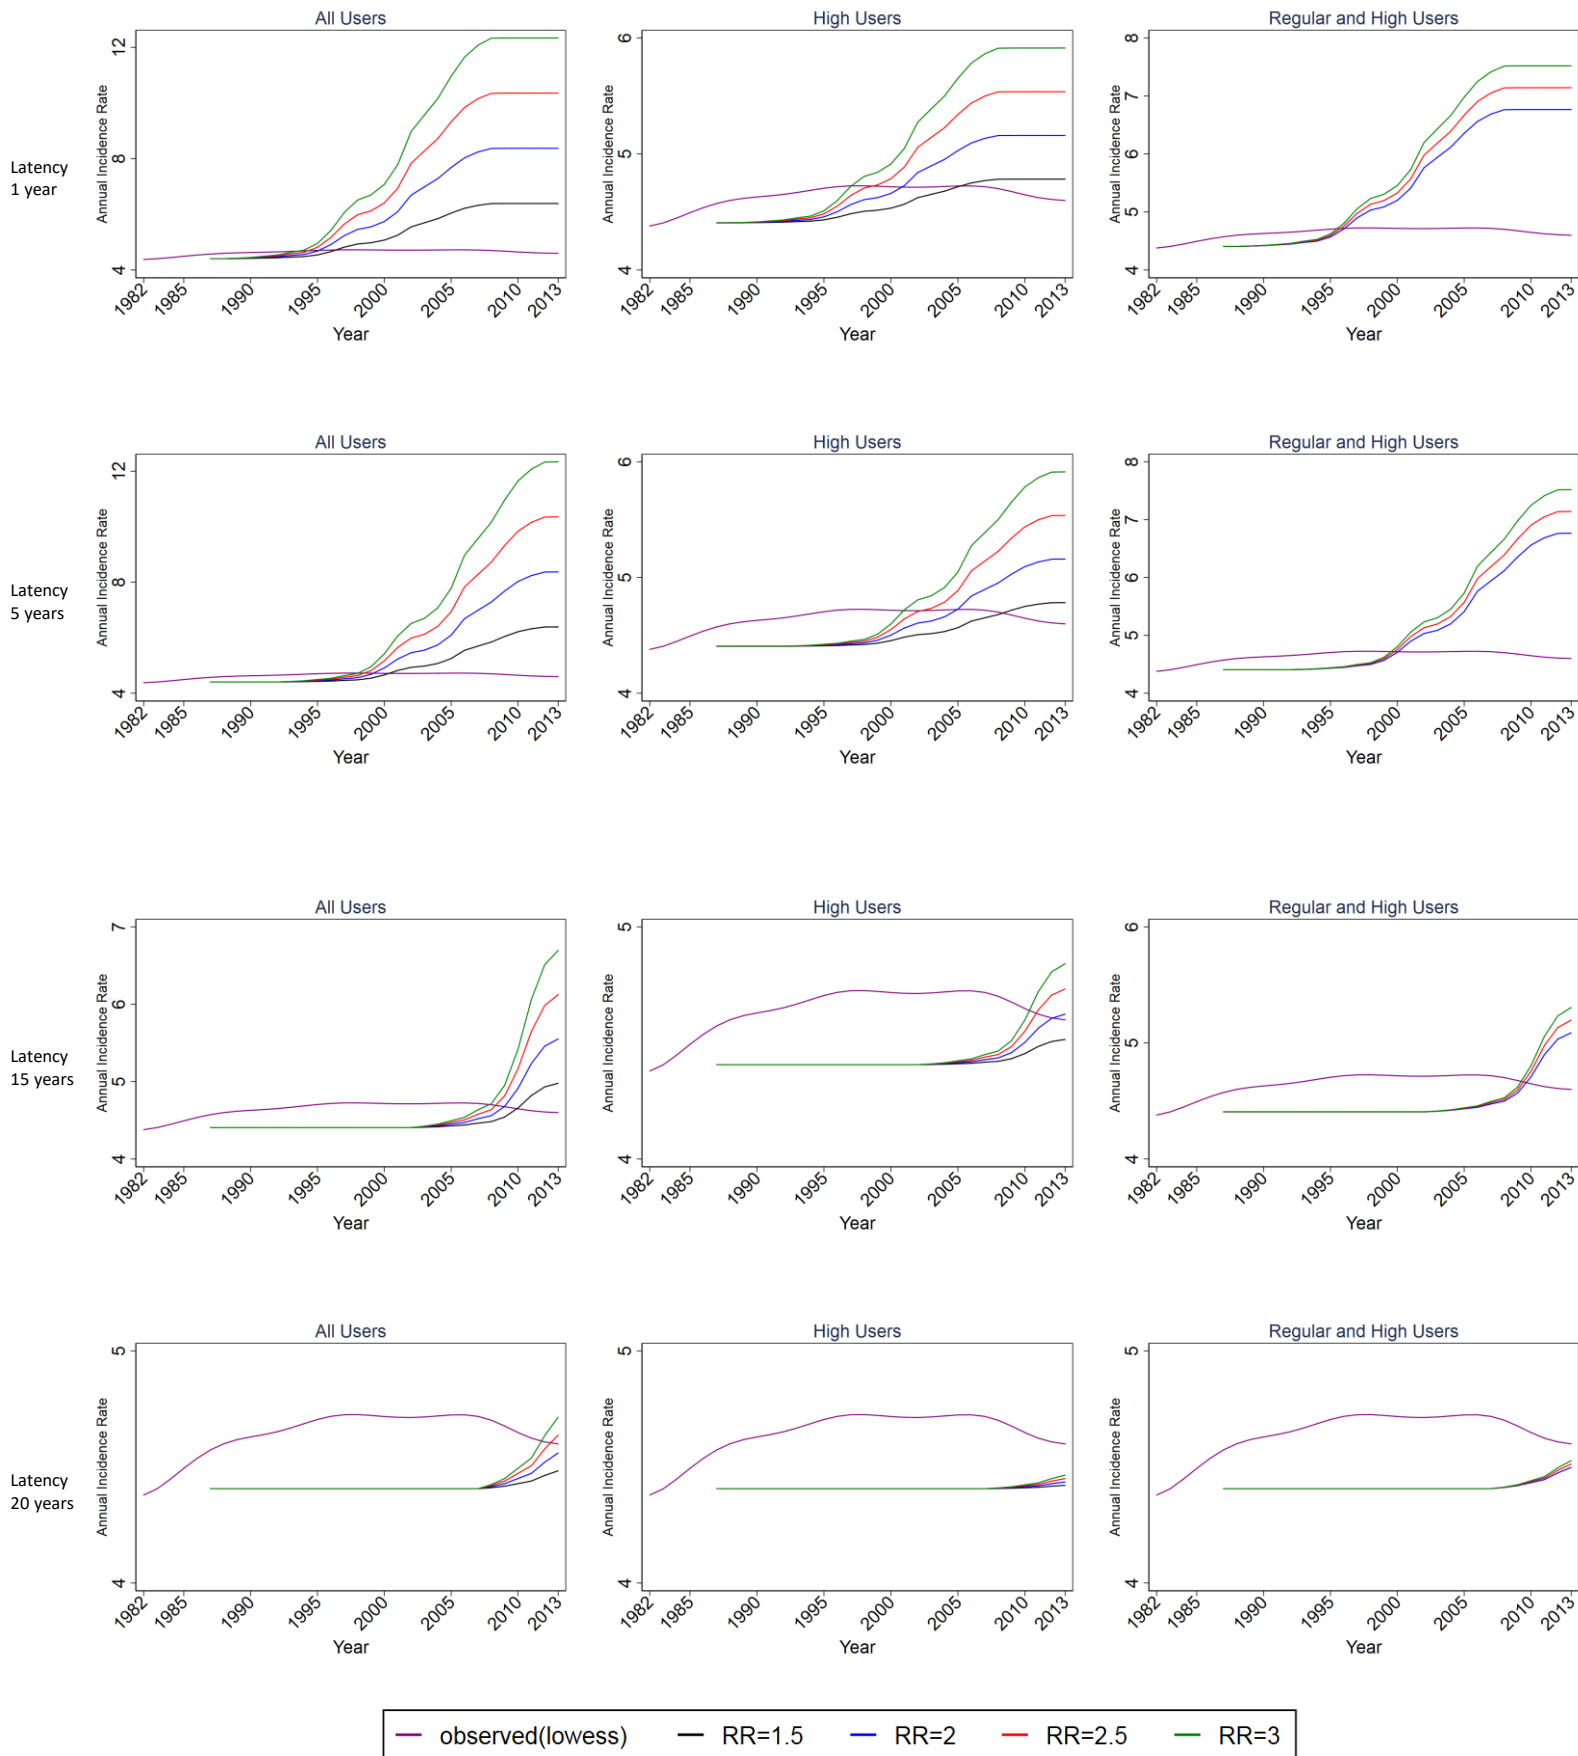

— observed(lowess)    — RR=1.5    — RR=2    — RR=2.5    — RR=3

\*Lowess Smoothing
